# Supplementary material for: An activated coumarin-enamine Michael acceptor for CN−
Source: Royal Society of Chemistry journal article supplement (doi:10.1039/c4nj00862f), 2014-01-01
Supplement: c4nj00862f1.pdf [file c4nj00862f1.pdf]

## Supporting Information

### An Activated Coumarin Michael Acceptor for CN<sup>-</sup>

Aaron B. Davis<sup>(a)</sup>, Rachel E. Lambert<sup>(a)</sup>, Frank R. Fronczek<sup>(b)</sup>, Peter J. Cragg<sup>(c)</sup> and Karl J. Wallace<sup>\*(a)</sup>

(a) Department of Chemistry and Biochemistry University of Southern Mississippi, Hattiesburg, Mississippi 39406, United States (b) Department of Chemistry, Louisiana State University, , Baton Rouge, Louisiana, 70803, United States (c) School of Pharmacy and Biomolecular Sciences, University of Brighton, Brighton BN2 4GJ United Kingdom

|                                        |            |
|----------------------------------------|------------|
| Tautomers and numbering scheme.....    | Page 2     |
| Solvent polarity factor.....           | Page 2-4   |
| UV-vis studies.....                    | Page 5-9   |
| Fluorescence studies.....              | Page 9-14  |
| ESI mass spectrometry.....             | Page 14    |
| NMR studies of compound <b>3</b> ..... | Page 15-27 |
| NMR studies of <b>3-CN</b> adduct..... | Page 28-37 |
| Jobs plot.....                         | Page 38    |
| Detection limit (LOD).....             | Page 38    |
| Kinetic studies.....                   | Page 39    |
| Molecular modelling.....               | Page 40-42 |
| X-Ray crystallography.....             | Page 42-47 |
| References.....                        | Page 48    |

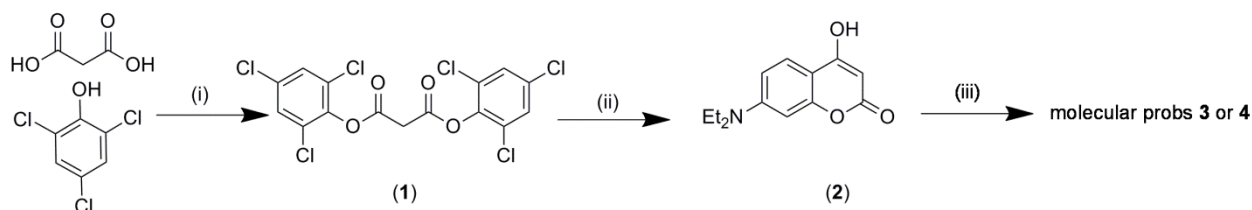

**Scheme S1:** The synthesis of the coumarin common intermediate (**2**): (i) phosphorus(v)oxychloride; (ii) 3-diethylaminophenol in toluene and (iii) one equivalent of amine, 1.5 equivalents of triethylorthoformate and propan-2-ol.

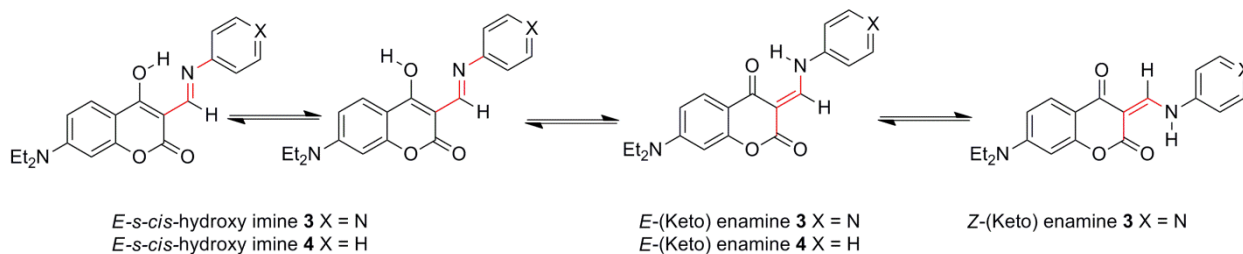

**Scheme S2:** Potential isomers and tautomers for compounds **3** and **4**. The existence of two species in solution in approximate 70:30 ratio in DMSO-*d*<sub>6</sub> is observed for *E*-(keto) enamine *Z*-(keto) enamine.

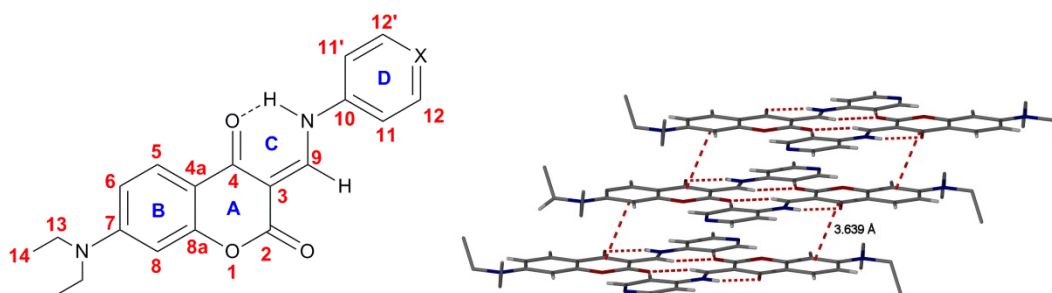

**Figure S1:** (Left) Numbering system and ring labeling system used in this work (right) X-ray packing highlighting the  $\pi$ - $\pi$  stacking (3.639 Å).

**Solvent polarity factor:** The organic solvents used for the calculation of the polarity factor ( $\Delta F$ ) were of spectroscopic grade. Dielectric constant ( $\epsilon$ ) and refractive index ( $n$ ) were taken from literature.<sup>1</sup> Following Lippert and Mataga the polarity factor was estimated using the following equation.

$$\Delta F = \frac{\epsilon - 1}{2\epsilon + 1} - \frac{n^2 - 1}{2n^2 + 1} \quad (\text{equation 1})$$

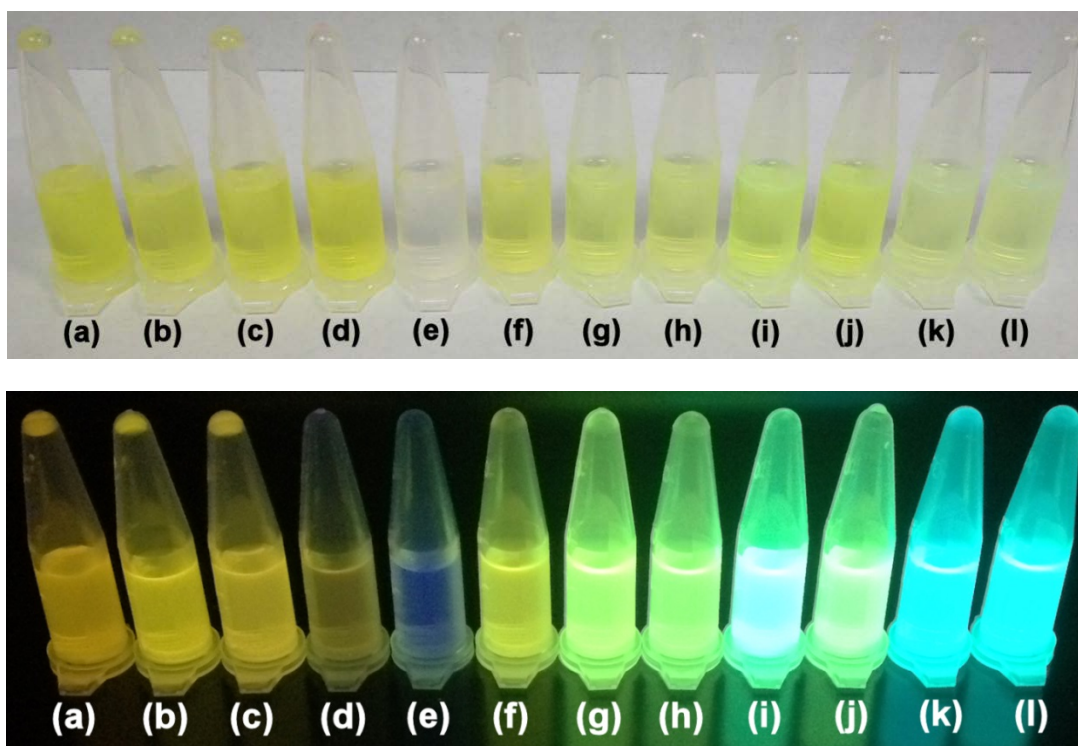

Figure S2: Compound **3** ( $3.0 \times 10^{-4} \text{ mol dm}^{-3}$ ) (a) DMSO, (b) MeCN, (c) DMF, (d) MeOH, (e) EtOH, (f) acetone, (g) THF, (h) EtOAc, (i)  $\text{CHCl}_3$ , (j)  $\text{CH}_2\text{Cl}_2$ , (k) toluene, (l) benzene.

Table S1: Absorption and fluorescence emission of molecular probe **3** in various solvents ( $\lambda_{\text{ex}} = \lambda_{\text{abs}}$ ; room temperature;  $16 \mu\text{mol dm}^{-3}$ ).

|     | Solvent                          | Dielectric constant | $\lambda_{\text{max}}^{\text{abs}}$ (nm) | $\lambda_{\text{max}}^{\text{em}}$ (nm) | Stokes Shift | $\Delta F$ |
|-----|----------------------------------|---------------------|------------------------------------------|-----------------------------------------|--------------|------------|
| (a) | dimethyl sulfoxide*              | 46.7                | 401                                      | 574                                     | 173          | 0.263      |
| (b) | acetonitrile*                    | 37.5                | 401                                      | 561                                     | 160          | 0.305      |
| (c) | <i>N, N</i> -dimethyl formamide* | 36.7                | 402                                      | 577                                     | 175          | 0.274      |
| (d) | methanol <sup>\$</sup>           | 32.7                | 406                                      | 573                                     | 167          | 0.309      |
| (e) | ethanol <sup>\$</sup>            | 24.5                | 343                                      | 385                                     | 42           | 0.289      |
| (f) | acetone*                         | 20.7                | 401                                      | 549                                     | 148          | 0.284      |
| (g) | tetrahydrofuran*                 | 7.6                 | 401                                      | 520                                     | 119          | 0.210      |
| (h) | ethyl acetate*                   | 6.0                 | 400                                      | 520                                     | 120          | 0.199      |
| (i) | chloroform <sup>+</sup>          | 4.8                 | 415                                      | 491                                     | 76           | 0.148      |
| (j) | dichloromethane <sup>+</sup>     | 8.9                 | 411                                      | 510                                     | 99           | 0.217      |
| (k) | toluene <sup>+</sup>             | 2.4                 | 406                                      | 473                                     | 67           | 0.015      |
| (l) | benzene <sup>+</sup>             | 2.3                 | 406                                      | 484                                     | 78           | 0.005      |

\* polar aprotic; <sup>\$</sup> polar protic; <sup>+</sup> non-polar

Table S2: Absorption and fluorescence emission of molecular probe **4** in various solvents ( $\lambda_{\text{ex}} = \lambda_{\text{abs}}$ ; room temperature;  $16 \mu\text{mol dm}^{-3}$ ).

|     | Solvent                          | Dielectric constant | $\lambda_{\text{max}}^{\text{abs}}$ (nm) | $\lambda_{\text{max}}^{\text{em}}$ (nm) | Stokes Shift | $\Delta F$ |
|-----|----------------------------------|---------------------|------------------------------------------|-----------------------------------------|--------------|------------|
| (a) | dimethyl sulfoxide*              | 46.7                | 398                                      | 542                                     | 144          | 0.263      |
| (b) | acetonitrile*                    | 37.5                | 394                                      | 519                                     | 125          | 0.305      |
| (c) | <i>N, N</i> -dimethyl formamide* | 36.7                | 396                                      | 526                                     | 130          | 0.274      |
| (d) | methanol <sup>s</sup>            | 32.7                | 397                                      | 511                                     | 114          | 0.309      |
| (e) | ethanol <sup>s</sup>             | 24.5                | 399                                      | 516                                     | 117          | 0.289      |
| (f) | acetone*                         | 20.7                | 394                                      | 511                                     | 117          | 0.284      |
| (g) | tetrahydrofuran*                 | 7.6                 | 394                                      | 484                                     | 90           | 0.210      |
| (h) | ethyl acetate*                   | 6.0                 | 392                                      | 480                                     | 88           | 0.199      |
| (i) | chloroform <sup>+</sup>          | 4.8                 | 399                                      | 460                                     | 61           | 0.148      |
| (j) | dichloromethane <sup>+</sup>     | 8.9                 | 398                                      | 480                                     | 82           | 0.217      |
| (k) | toluene <sup>+</sup>             | 2.4                 | 395                                      | 449                                     | 54           | 0.015      |
| (l) | benzene <sup>+</sup>             | 2.3                 | 396                                      | 457                                     | 61           | 0.005      |

(A)

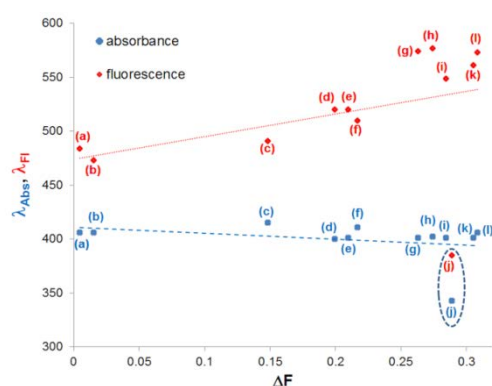

(B)

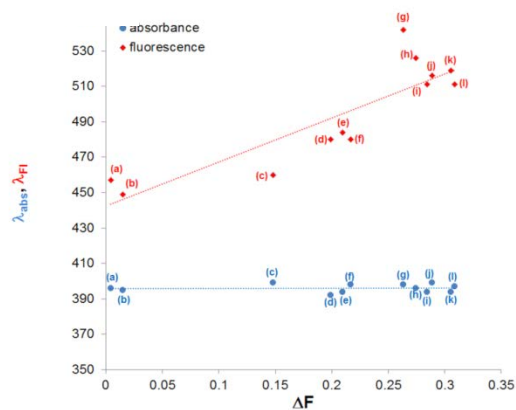

Figure S3: (A) Absorption and emission maxima of probe **3** and (B) Absorption and emission maxima of probe **4** in various solvents ( $16 \mu\text{mol dm}^{-3}$ ,  $25^\circ\text{C}$ ). a) benzene b) toluene c) chloroform d) ethyl acetate e) THF f) dichloromethane g) DMSO h) DMF i) acetone J) ethanol k) acetonitrile and l) methanol. As a note, the behavior of ethanol is a strange phenomenon; a number of coumarin-enamine derivatives have been prepared and we are currently investigating their solvatochromic effect. It is possible that the water content in the ethanol is affecting the behavior.

**UV-Vis studies (General procedure):** A stock solution of molecular probes **3** or **4** ( $3.1 \text{ mmol dm}^{-3}$ ) was prepared by dissolving 21 mg in 20 mL DMSO. From this stock solution a  $16 \text{ }\mu\text{M}$  solution of probes **3** or **4** was prepared in a one mL quartz cell for the UV-Vis spectroscopic studies. Anion stock solutions ( $3.1 \text{ mM}$ ) were also prepared in DMSO. These were then diluted in a  $10 \text{ mL}$  DMSO solution ( $311 \text{ }\mu\text{M}$ ). Aliquots of  $5 \text{ }\mu\text{L}$  of the anion was added to the UV-Vis cell (each  $5 \text{ }\mu\text{L}$  addition  $\equiv 0.1$  equivalents of anion).

Table S4. UV-Vis data for compounds **3** and **4**.

| Compound | $\text{CHCl}_3$                     | $\text{EtOH}$                       | $\text{DMSO}$                       | $\text{DMSO:H}_2\text{O}$           |
|----------|-------------------------------------|-------------------------------------|-------------------------------------|-------------------------------------|
|          | $\lambda_{\text{max}} (\epsilon)^*$ | $\lambda_{\text{max}} (\epsilon)^*$ | $\lambda_{\text{max}} (\epsilon)^*$ | $\lambda_{\text{max}} (\epsilon)^*$ |
| <b>3</b> | 415 (38,723)                        | 342 (43,654)                        | 404 (44,387)                        | 348 (25,599)                        |
| <b>4</b> | 402 (50,460)                        | 400 (62,485)                        | 398 (51,963)                        | 398 (57,150)                        |

$\lambda_{\text{max}}$  in nm; ( $\epsilon$ ) in  $\text{L mol}^{-1} \text{cm}^{-1}$

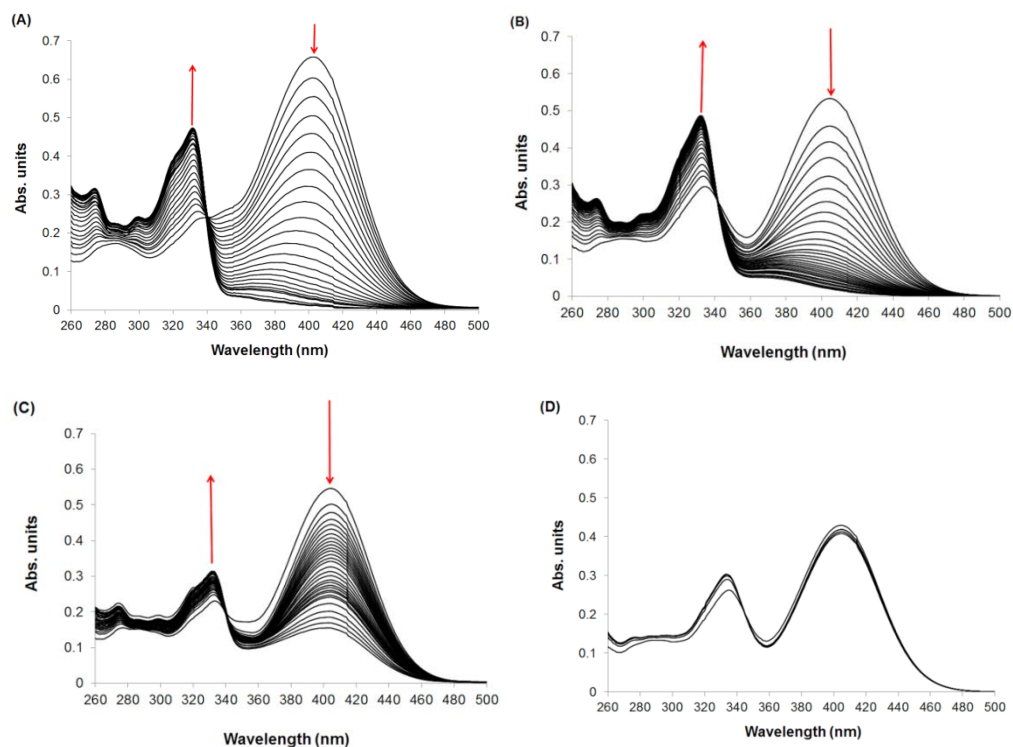

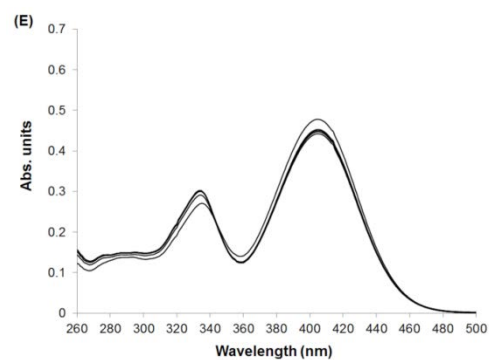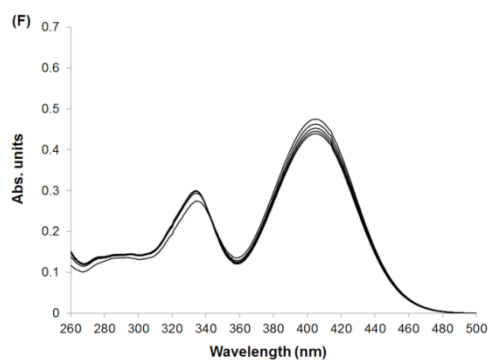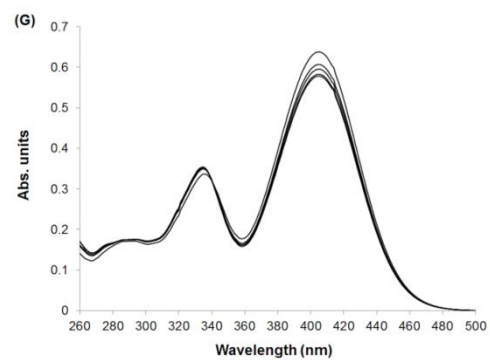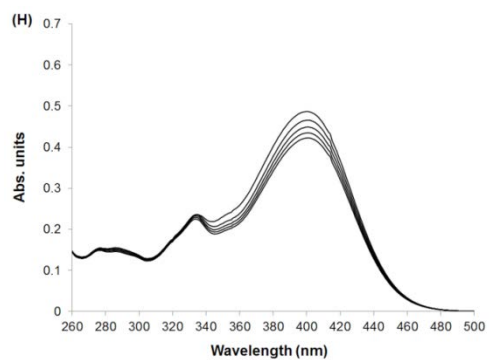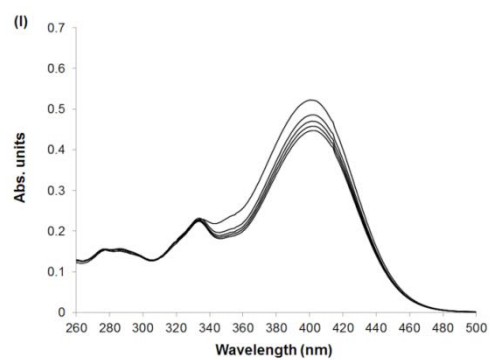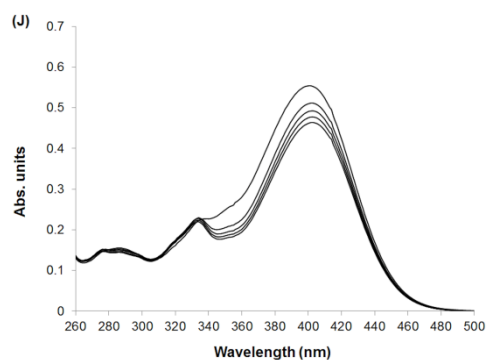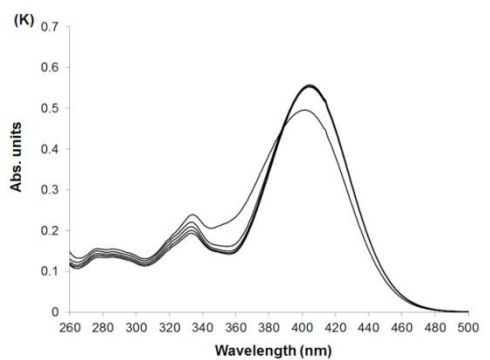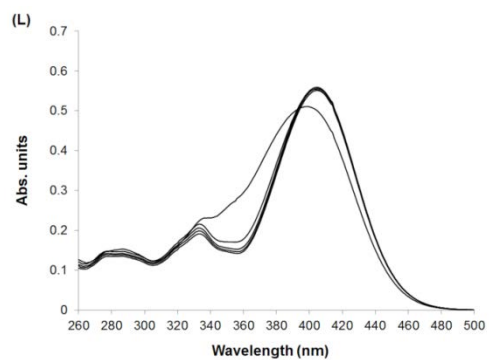

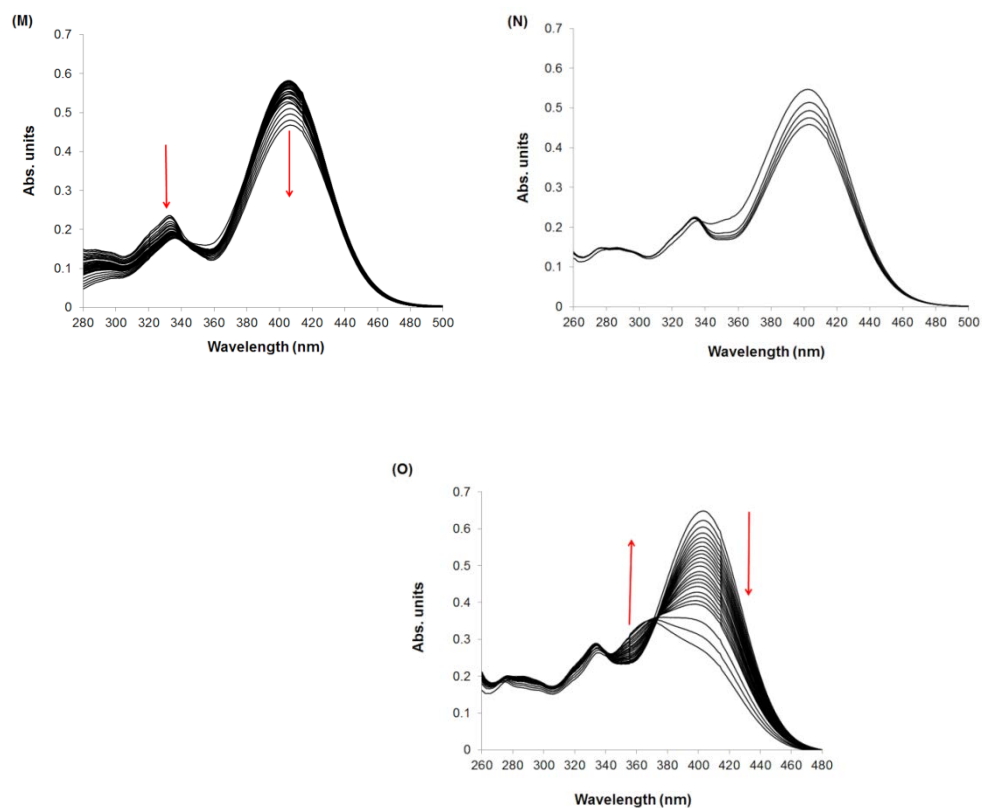

Figure S4: UV-Vis response of molecular probe **3** upon the addition of the following anions ( $15.6 \text{ mmol dm}^{-3}$  in DMSO): (A) KCN (B) TBAF (C)  $\text{TBAH}_2\text{PO}_4$  (D) TBABr (E) TBACl (F) TBAI (G)  $\text{TBANO}_3$  (H)  $\text{NaBF}_4$  (I)  $\text{NaN}_3$  (J)  $\text{TBAHSO}_4$  (K)  $\text{NH}_4\text{SCN}$  (L)  $\text{NH}_4\text{ClO}_4$  (M)  $\text{TBACH}_3\text{CO}_2$  (N)  $\text{NH}_4\text{OH}$  and (O) octylamine.

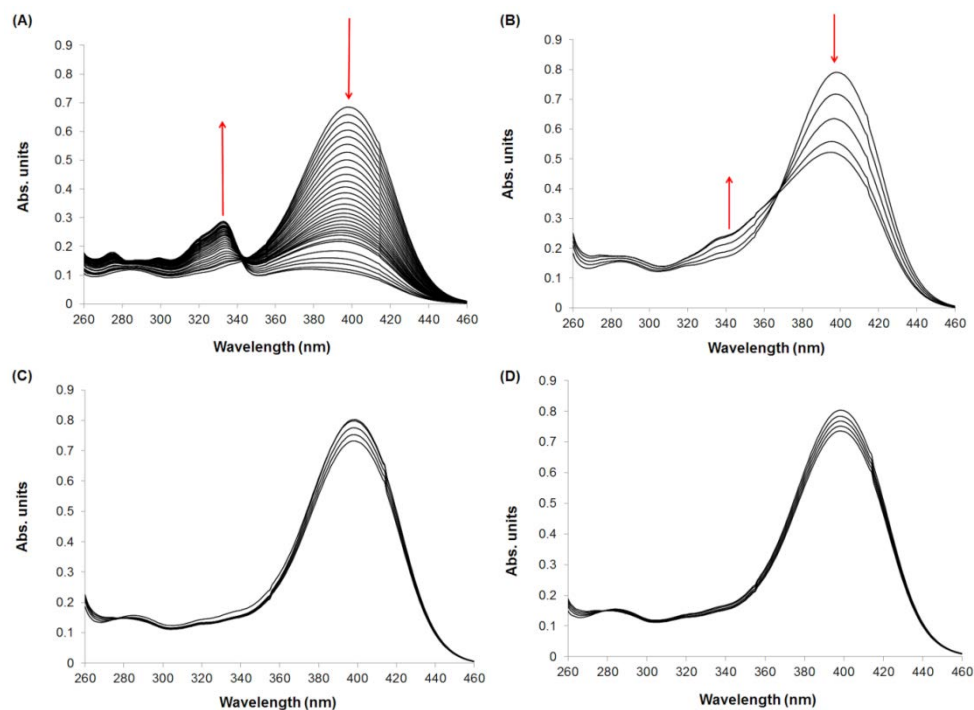

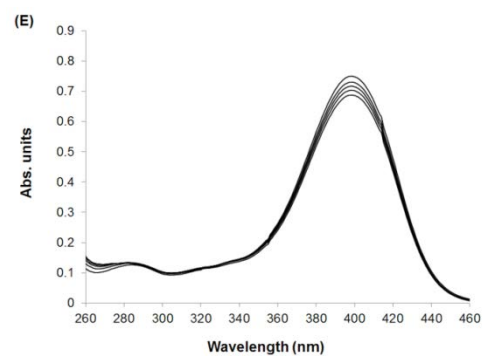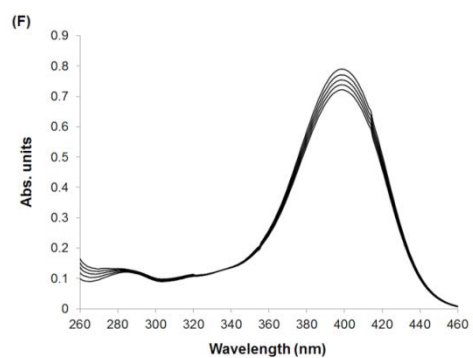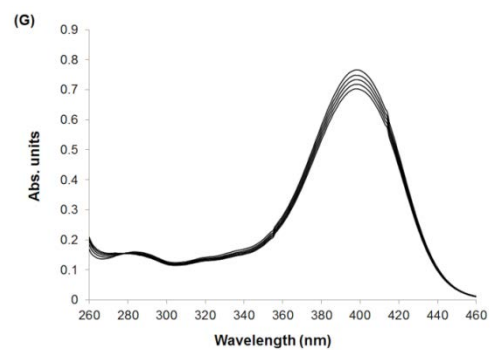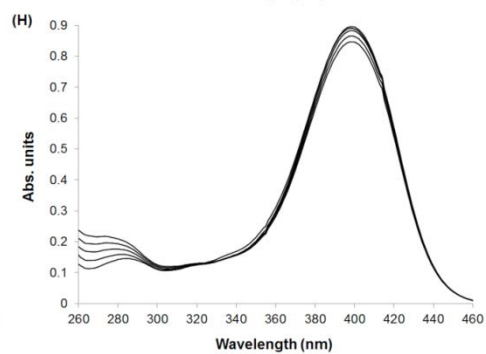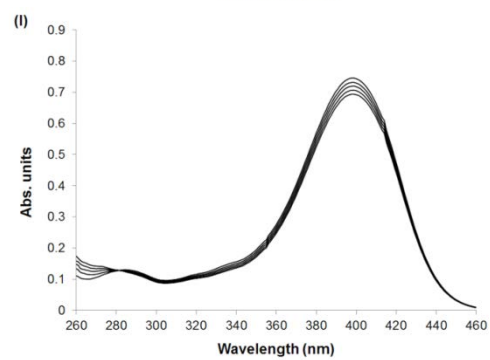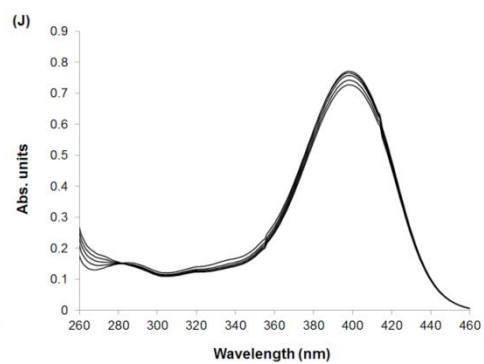



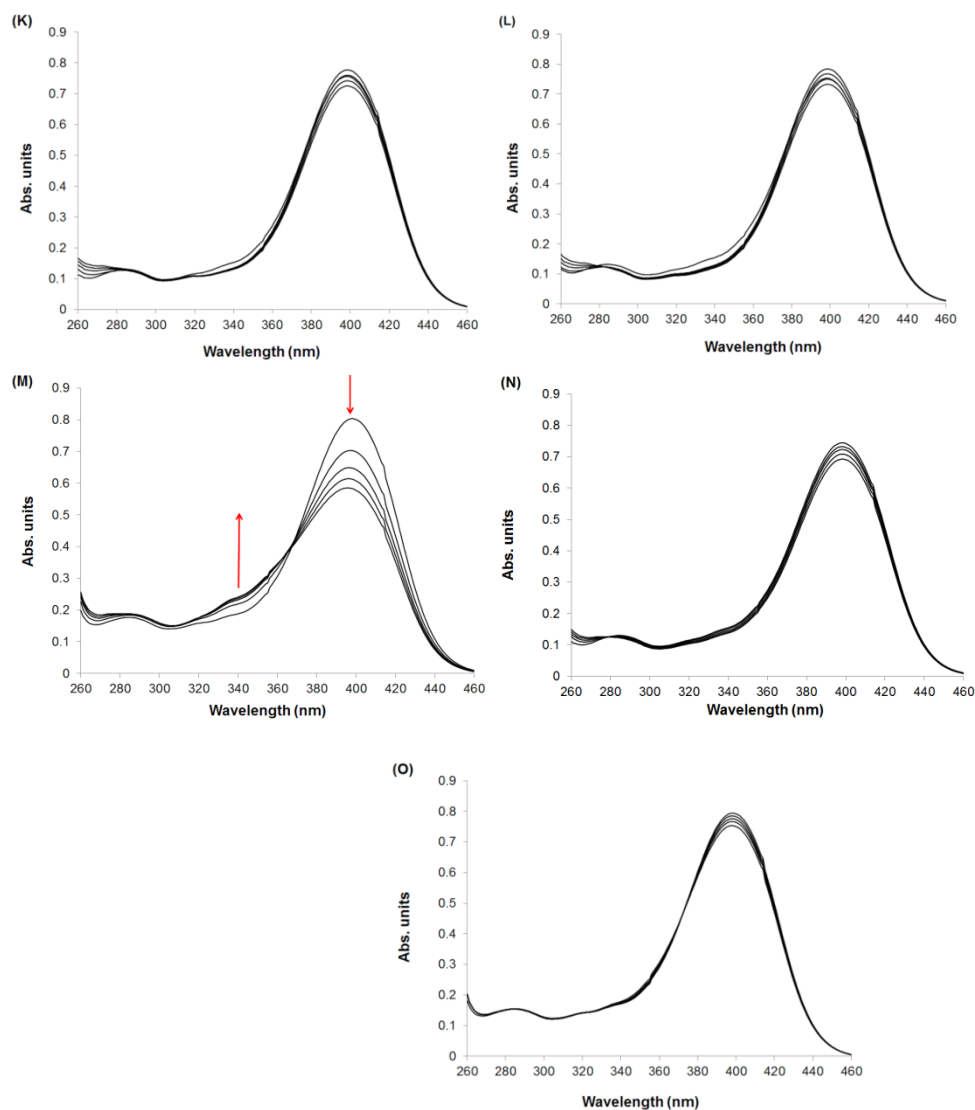

Figure S5: UV-Vis response of molecular probe **4** upon the addition of the following anions ( $15.6 \text{ mmol dm}^{-3}$  in DMSO): (A) KCN (B) TBAF (C)  $\text{TBAH}_2\text{PO}_4$  (D) TBABr (E) TBACl (F) TBAI (G)  $\text{TBANO}_3$  (H)  $\text{NaBF}_4$  (I)  $\text{NaN}_3$  (J)  $\text{TBAHSO}_4$  (K)  $\text{NH}_4\text{SCN}$  (L)  $\text{NH}_4\text{ClO}_4$  (M)  $\text{TBACH}_3\text{CO}_2$  (N)  $\text{NH}_4\text{OH}$  and (O) octylamine.

**Fluorescence Studies:** For all fluorescence studies stock solution were prepared. Compounds **3** and **4** were then diluted by removing  $100 \mu\text{L}$  and diluting to  $2 \text{ mL}$ . Aliquots of  $10 \mu\text{L}$  of the anion was added, equivalent to 0.1 equivalences.

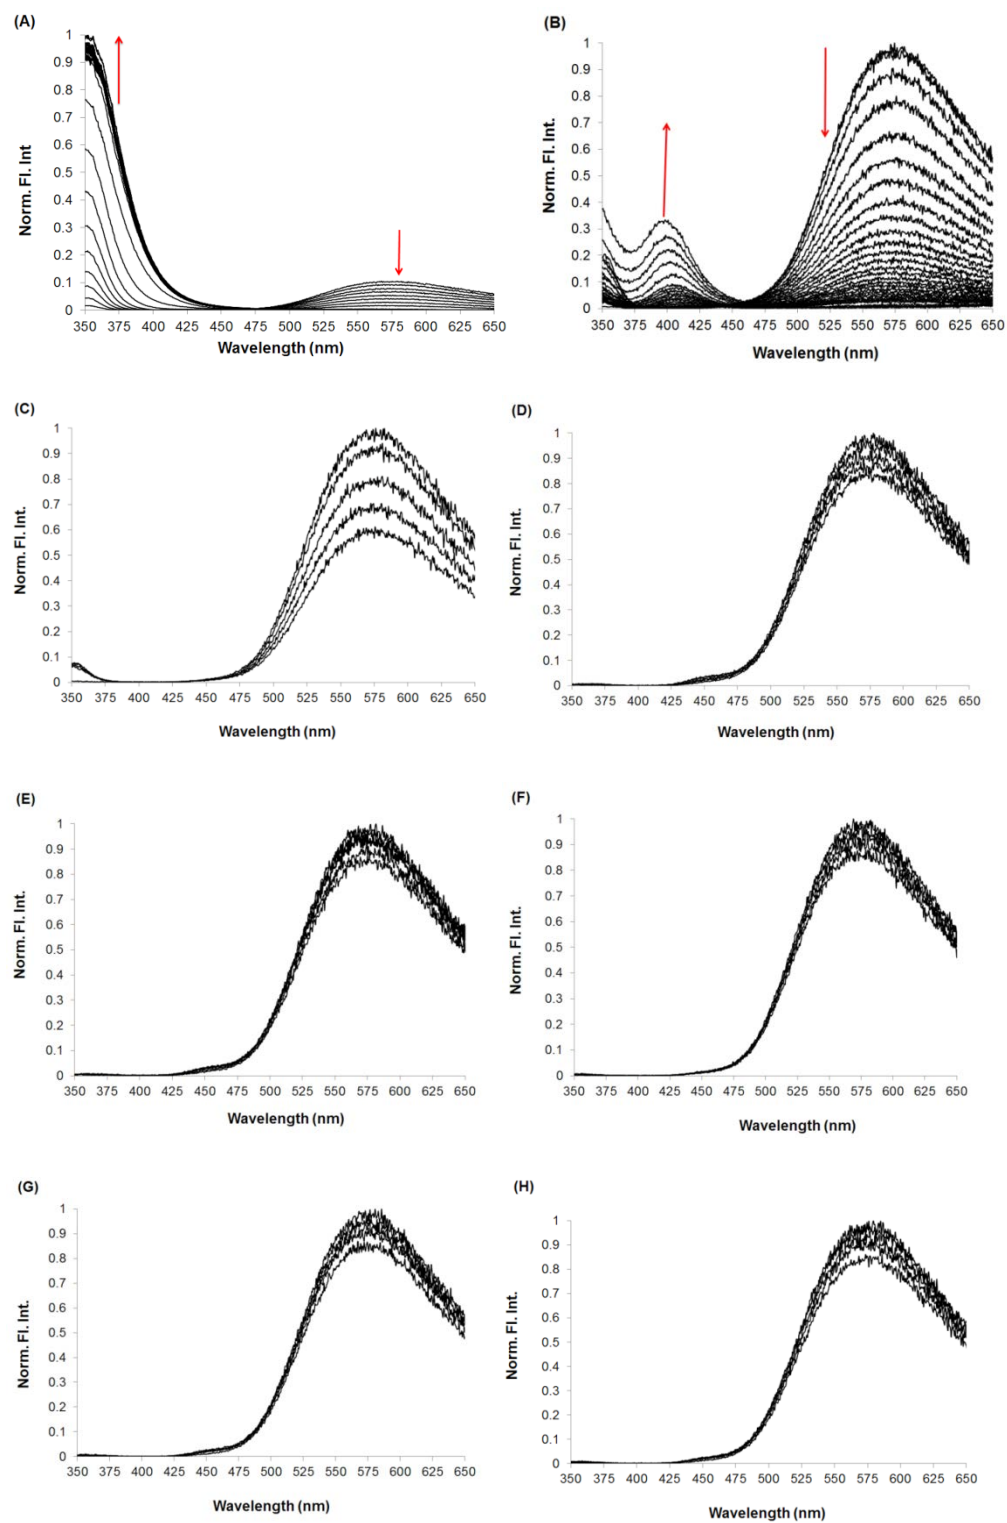

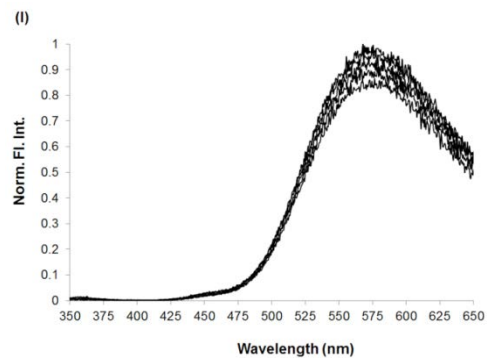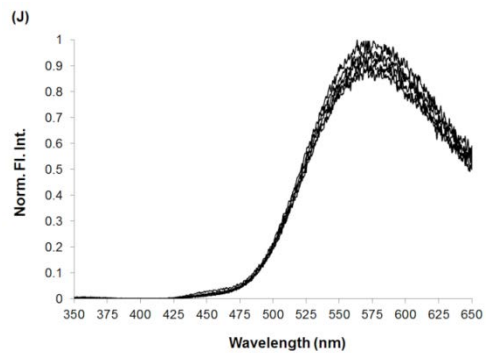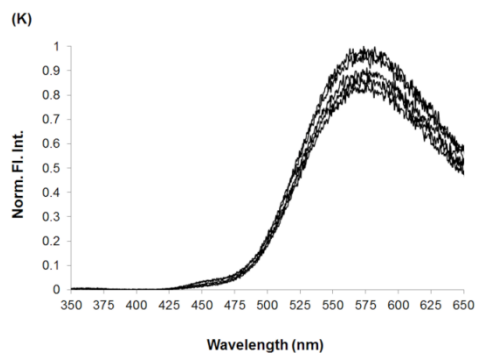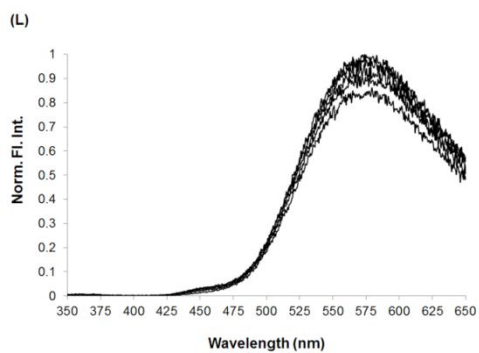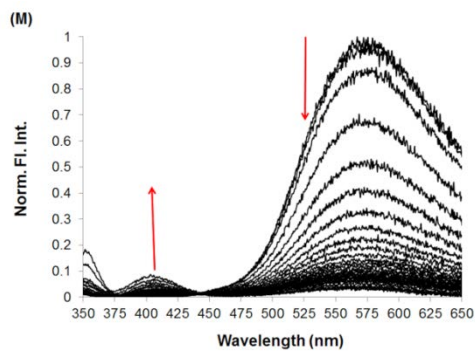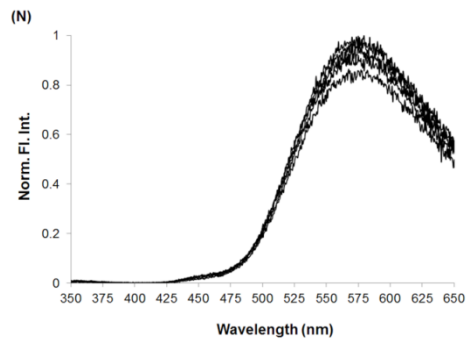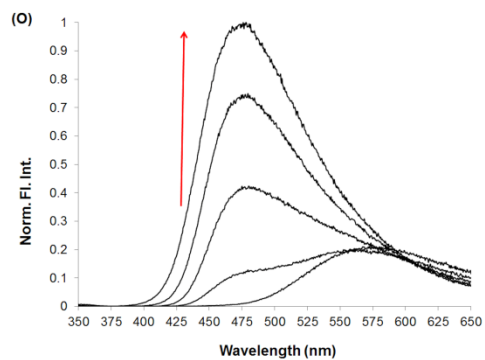

Figure S6: Fluorescence response of molecular probe **3** upon the addition of the following anion ( $16\ \mu\text{mol dm}^{-3}$  in DMSO,  $\lambda_{\text{ex}} = 339$ ): (A) KCN (B) TBAF (C)  $\text{TBAH}_2\text{PO}_4$  (D) TBABr (E) TBACl (F) TBAI (G)  $\text{TBANO}_3$  (H)  $\text{NaBF}_4$  (I)  $\text{NaN}_3$  (J)  $\text{TBAHSO}_4^-$  (K)  $\text{NH}_4\text{SCN}$  (L)  $\text{NaClO}_4$  (M)  $\text{TBACH}_3\text{CO}_2$  (N)  $\text{NH}_4\text{OH}$  and (O) octylamine.

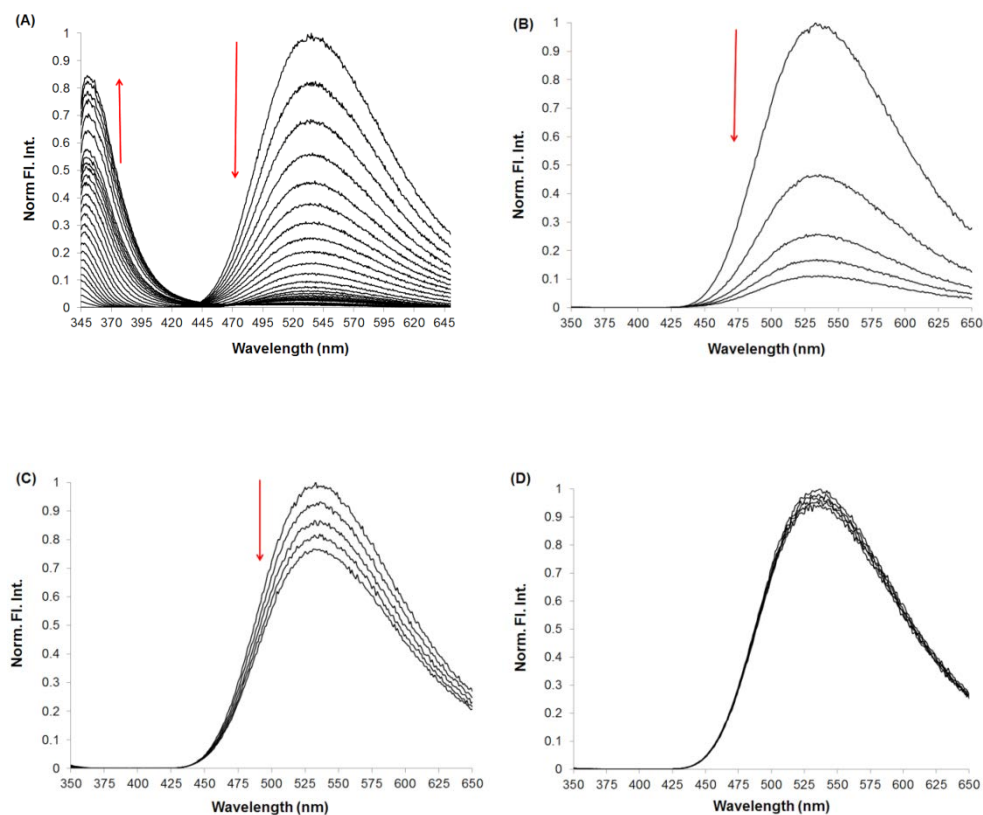

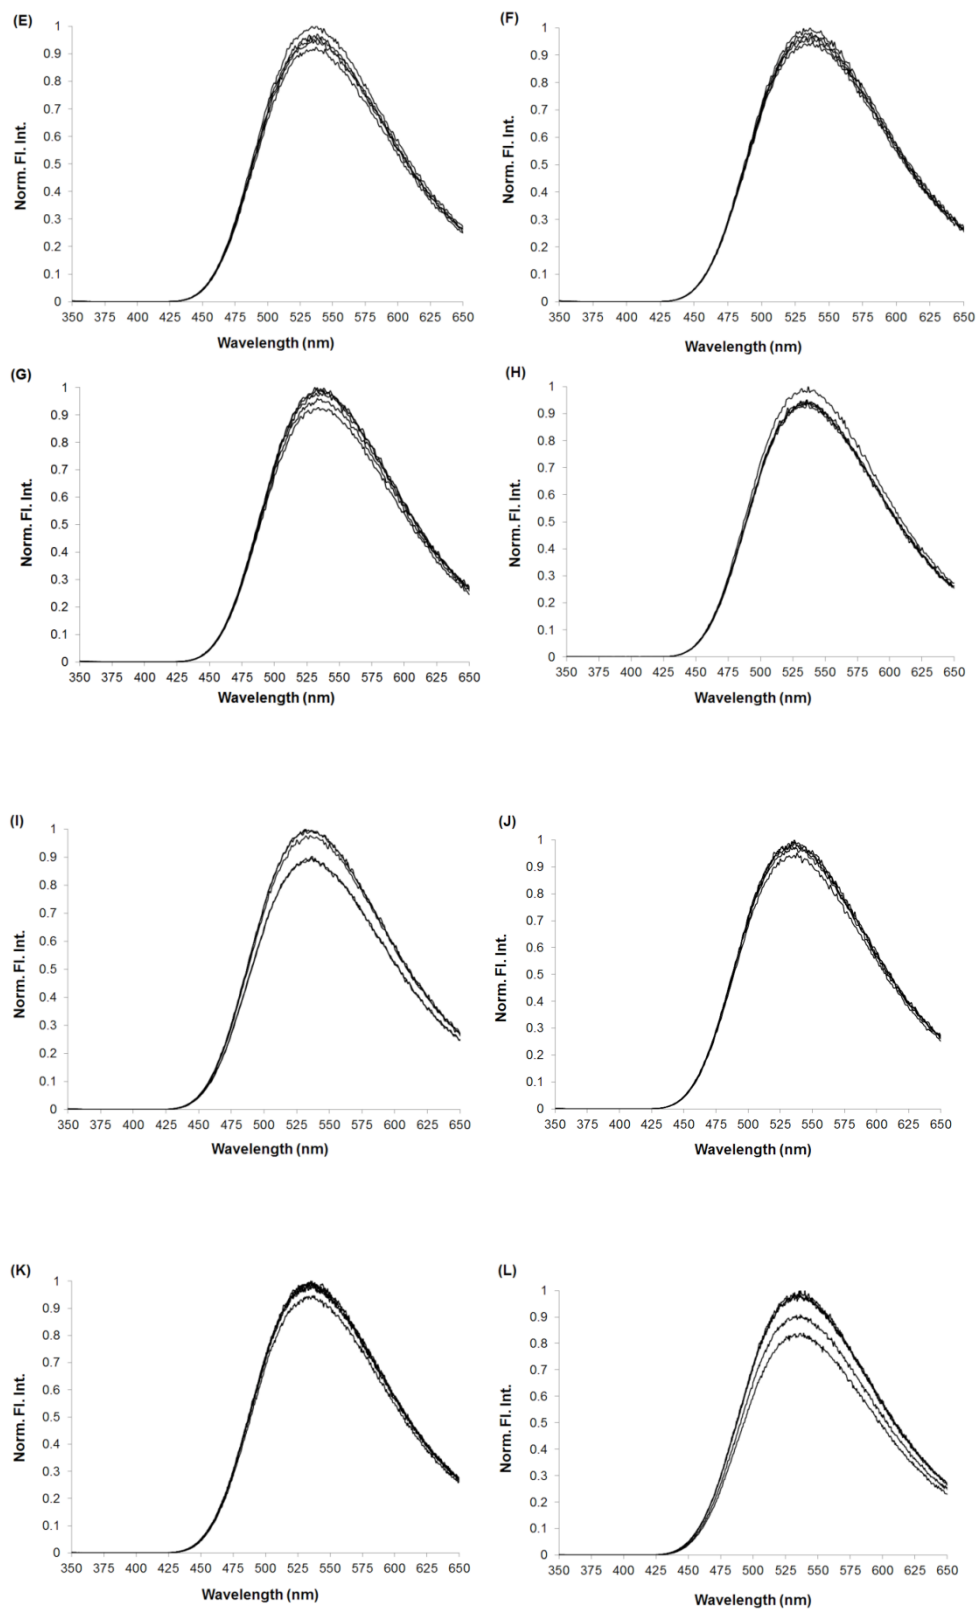

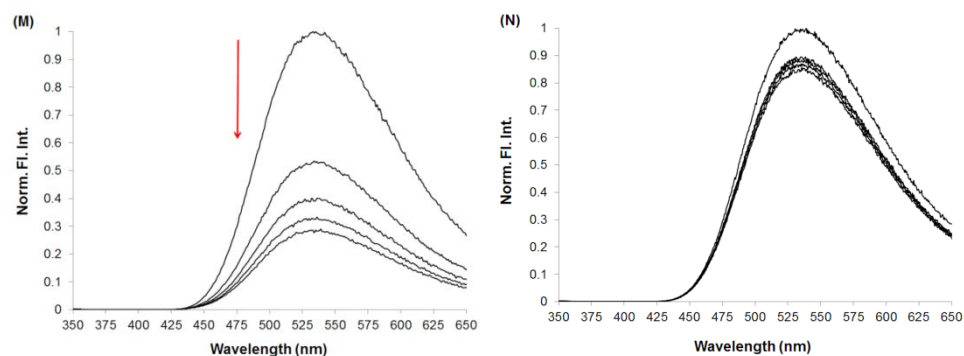

Figure S7: Fluorescence response of molecular probe 4 upon the addition of the following anions in increments of 0.5, 1.0, 1.5 and 2 equivalents of the following anions ( $16 \mu\text{mol dm}^{-3}$  in DMSO,  $\lambda_{\text{ex}} = 339$ ): (A) KCN (B) TBAF (C) TBAH<sub>2</sub>PO<sub>4</sub> (D) TBABr (E) TBACl (F) TBAI (G) TBANO<sub>3</sub> (H) NaBF<sub>4</sub> (I) NaN<sub>3</sub> (J) HSO<sub>4</sub><sup>-</sup> (K) NH<sub>4</sub>SCN (L) NH<sub>4</sub>ClO<sub>4</sub> (M) TBACH<sub>3</sub>CO<sub>2</sub> and (N) NH<sub>4</sub>OH.

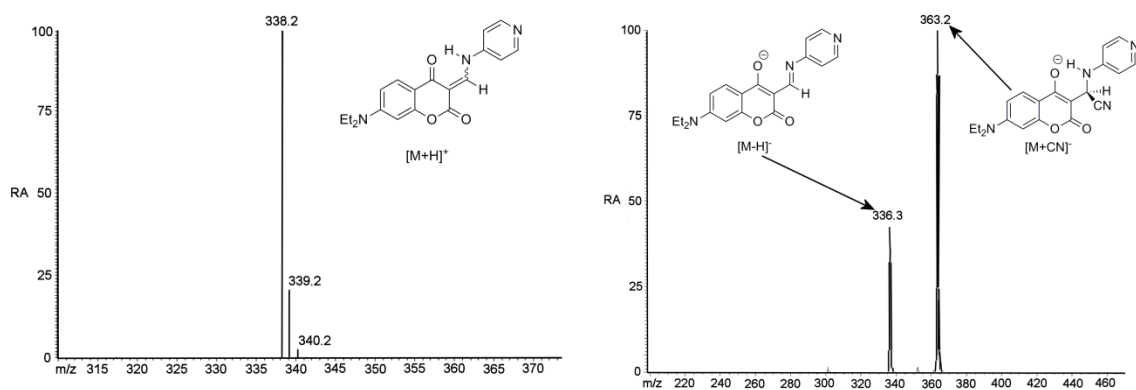

Figure S8: ESI-MS; the free molecular probe (positive mode) and the probe 3-CN adduct (negative mode). The free molecular probe can also be observed in the negative mode.

## NMR studies of probe 3:

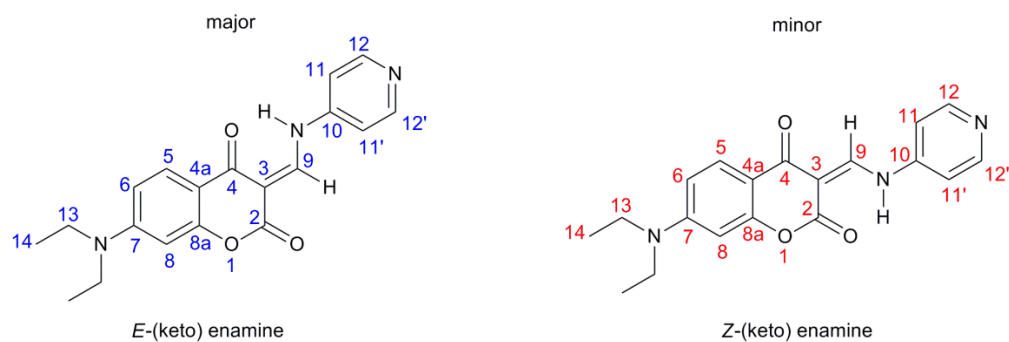

Figure S9: Numbering scheme used for the NMR assignments for molecular probe **3**: the chemical shifts, coupling constants ( $J$  in Hz) for the two isomers.

| Label  | <i>E</i> -(keto)-enamine |              | <i>Z</i> -(keto)-enamine |              |
|--------|--------------------------|--------------|--------------------------|--------------|
|        | proton (ppm, Hz)         | carbon (ppm) | proton (ppm, Hz)         | carbon (ppm) |
| 2      | NA                       | 163.0        | NA                       | 164.5        |
| 3      | NA                       | 99.2         | NA                       | 99.7         |
| 4      | NA                       | 180.2        | NA                       | 176.3        |
| 4a     | NA                       | 152.7        | NA                       | 152.6        |
| 5      | 7.84                     | 127.0        | 7.87                     | 127.5        |
| 6      | 6.58                     | 108.0        | 6.58                     | 108.0        |
| 7      | NA                       | 107.7        | NA                       | 107.7        |
| 8      | 6.32                     | 96.3         | 6.34                     | 96.3         |
| 8a     | NA                       | 156.6        | NA                       | 156.3        |
| 9      | 8.85                     | 151.8        | 8.97                     | 151.8        |
| 10     | NA                       | 144.4        | NA                       | 144.6        |
| 11/11' | 7.27                     | 111.4        | 7.32                     | 111.7        |
| 12/12' | 8.62                     | 150.9        | 8.62                     | 150.9        |
| 13     | 3.45                     | 44.3         | 3.45                     | 44.3         |
| 14     | 1.24                     | 11.9         | 1.24                     | 11.9         |
| -NH    | 13.47                    | NA           | 11.52                    | NA           |

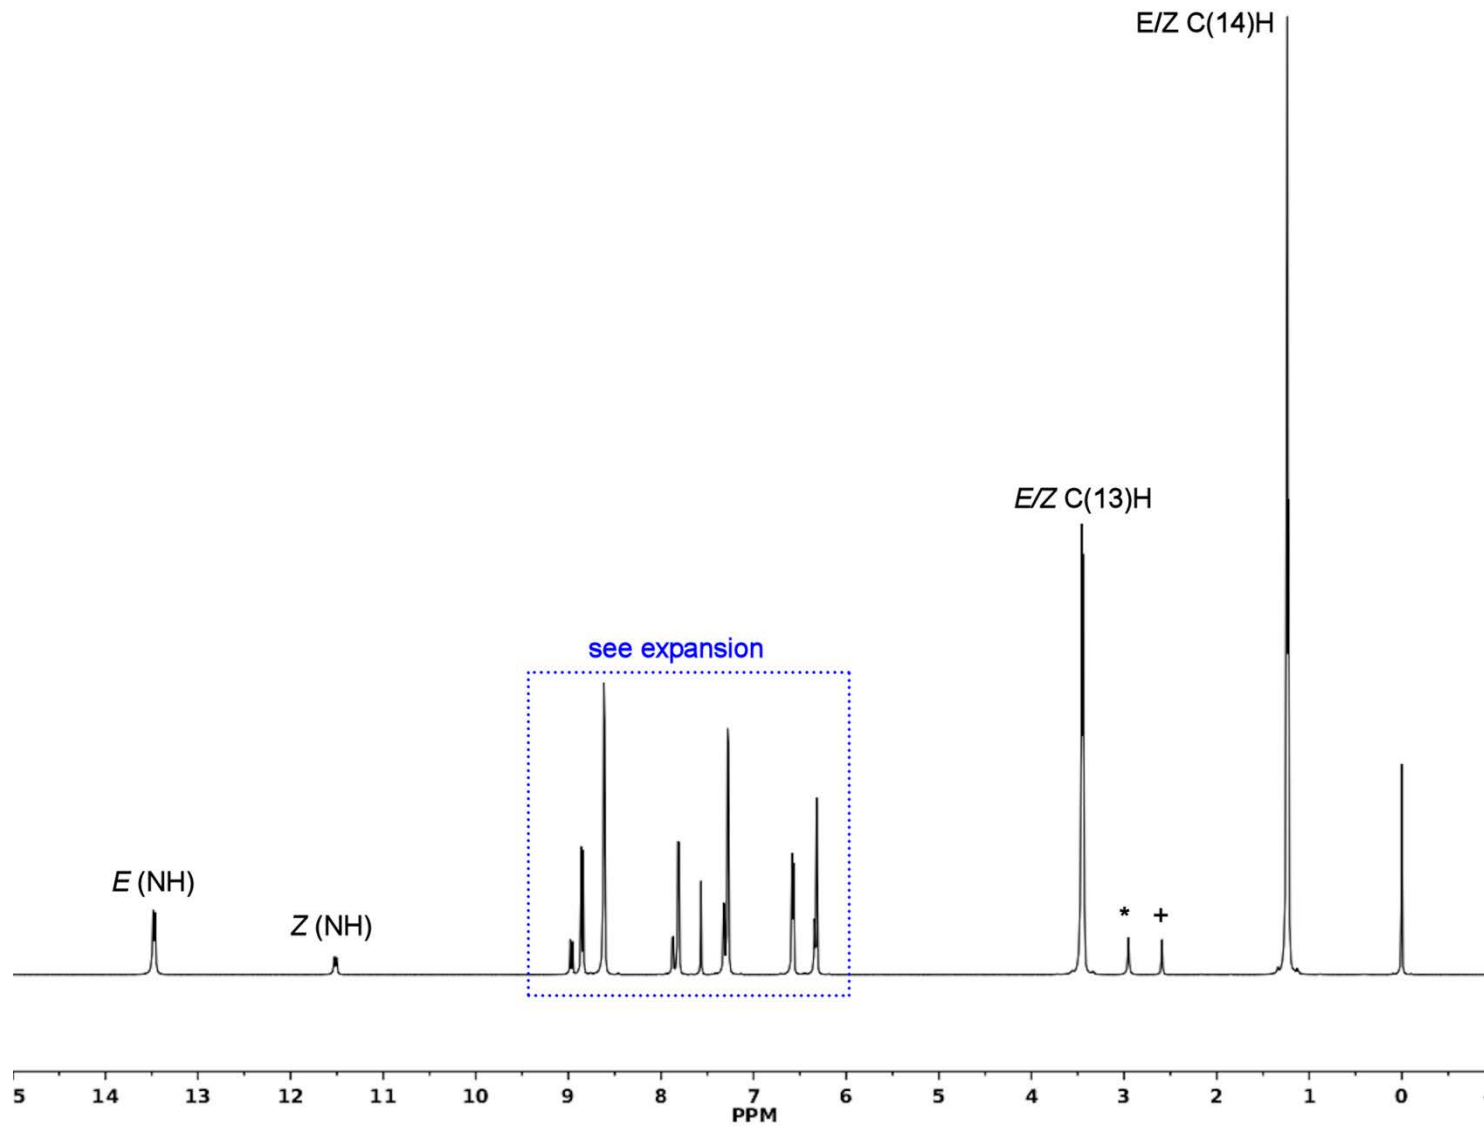

Figure S10:  $^1\text{H}$  NMR of probe **3** in a mixture of  $\text{DMSO}-d_6$ : $\text{CHCl}_3-d$  (1:7) (full spectrum).



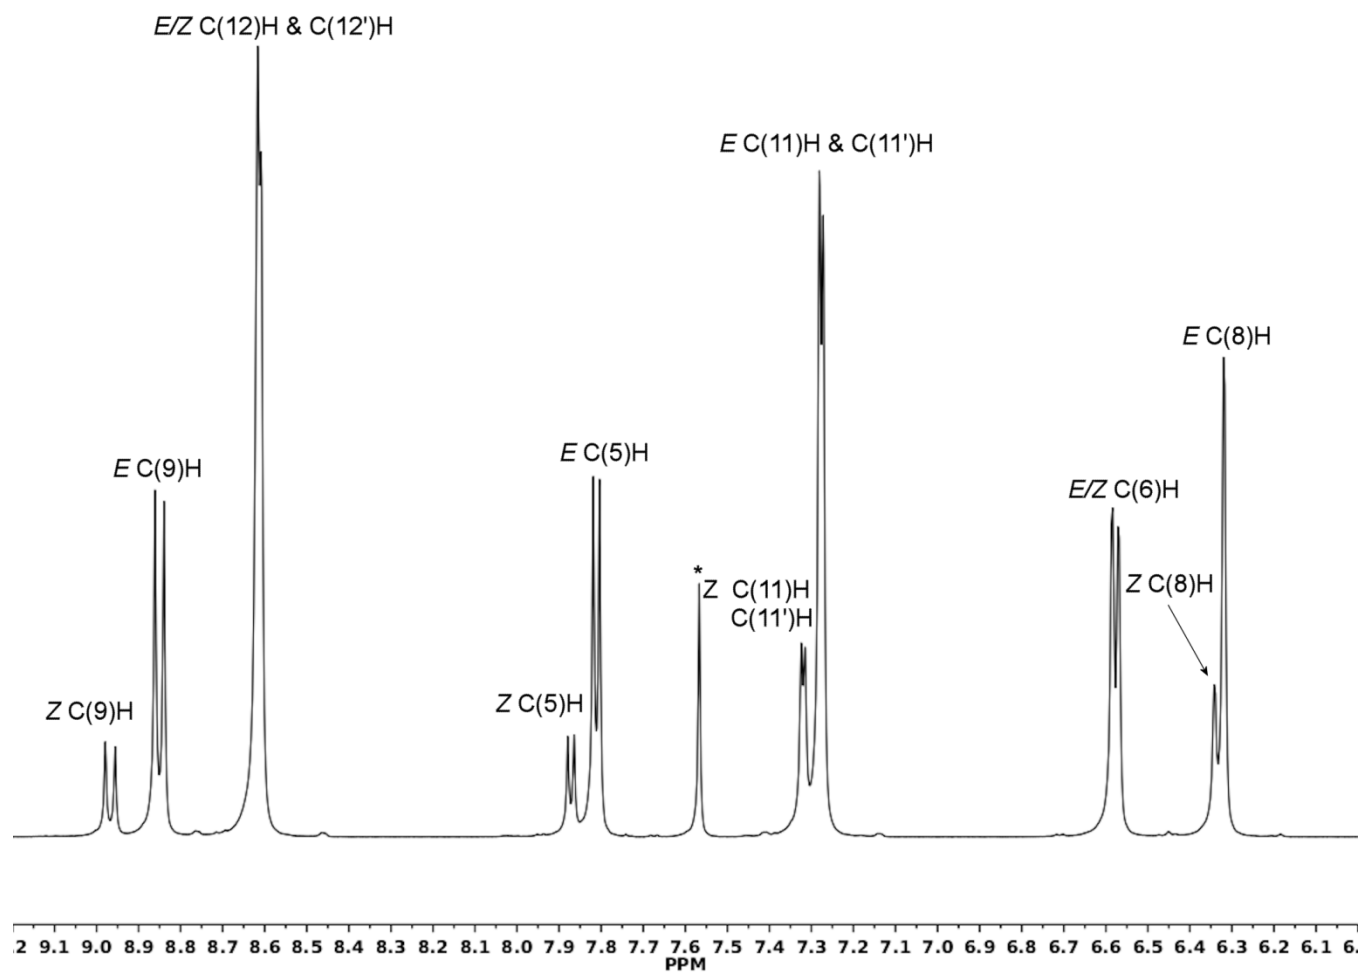

Figure S11:  $^1\text{H}$  NMR of probe **3** in a mixture of  $\text{DMSO-}d_6$ : $\text{CHCl}_3$ - $d$  (1:7) (aromatic region).

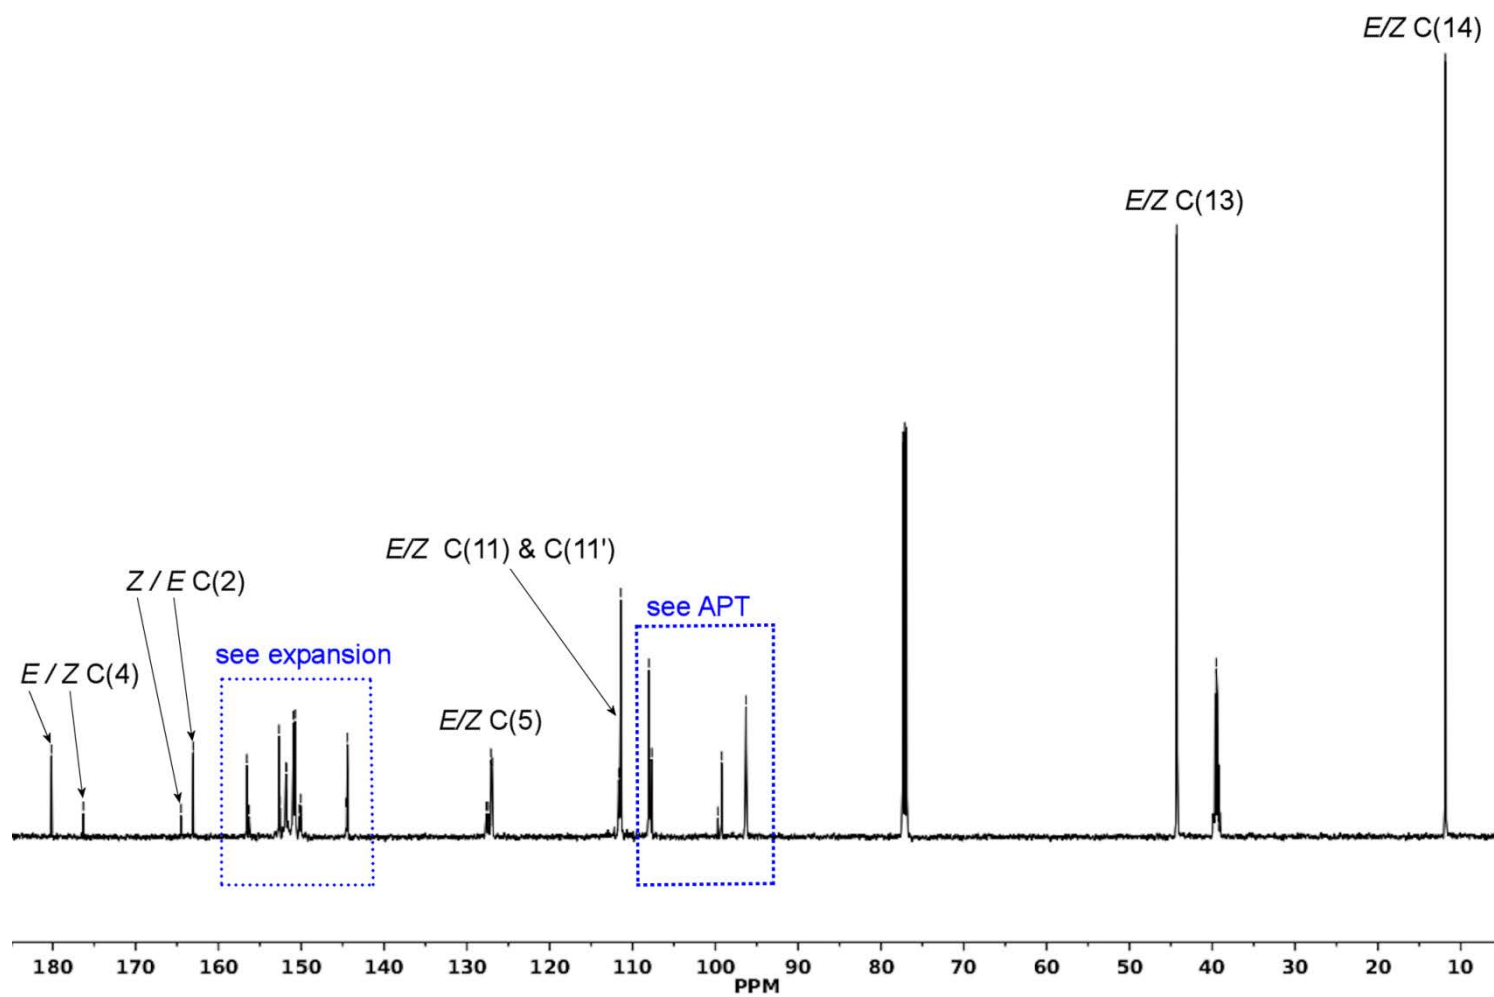

Figure S12:  $^{13}\text{C}$  NMR of probe **3** in a mixture of  $\text{DMSO-}d_6$ : $\text{CHCl}_3$ - $d$  (1:7) (full spectrum).

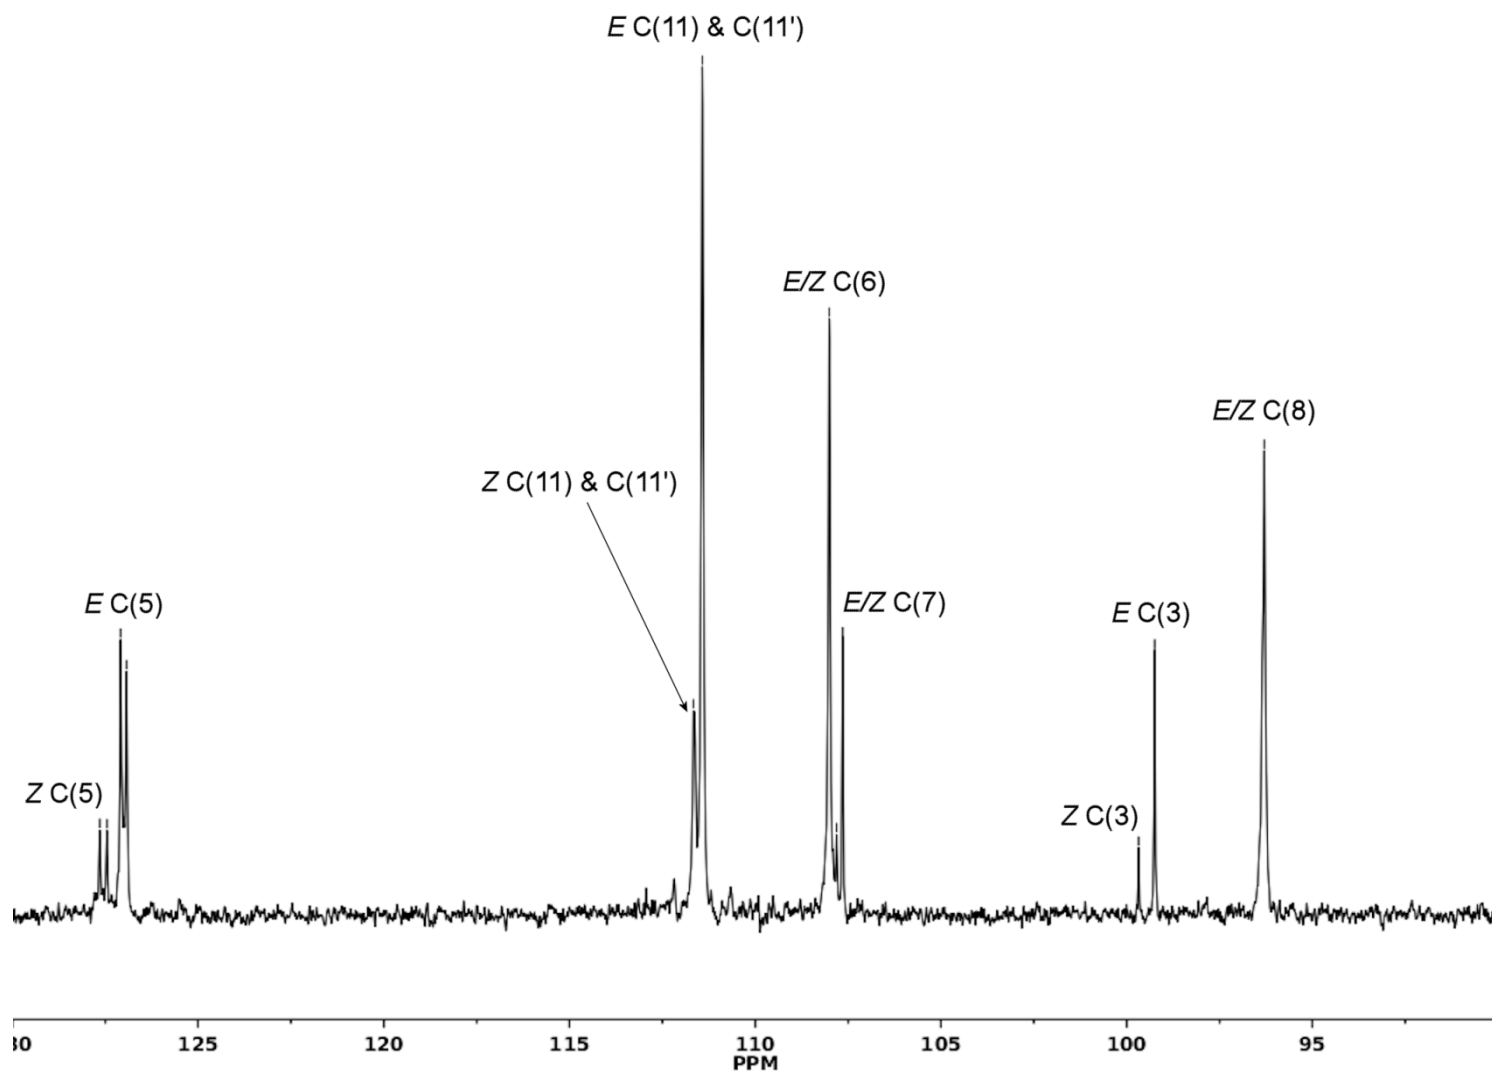

Figure S13:  $^{13}\text{C}$  NMR of probe **3** in a mixture of  $\text{DMSO}-d_6$ : $\text{CHCl}_3-d$  (1:7) (expanded).

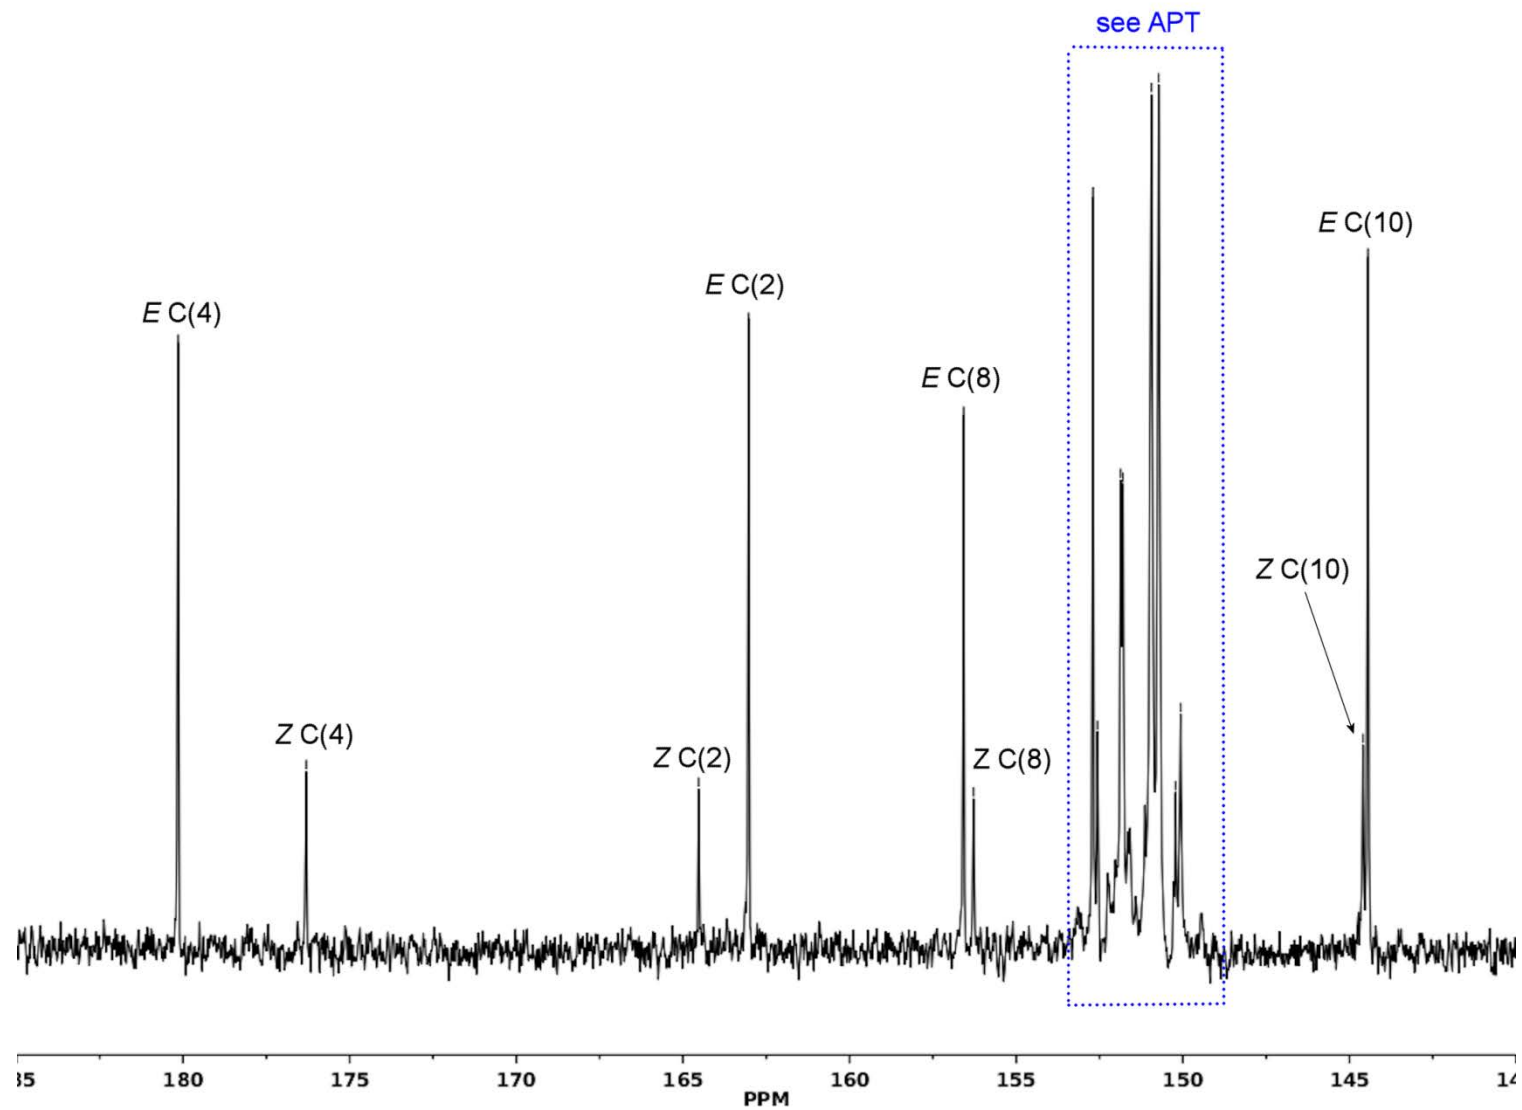

Figure S14: <sup>13</sup>C NMR of probe 3 in a mixture of DMSO-*d*<sub>6</sub>:CHCl<sub>3</sub>-*d* (1:7) (expanded)

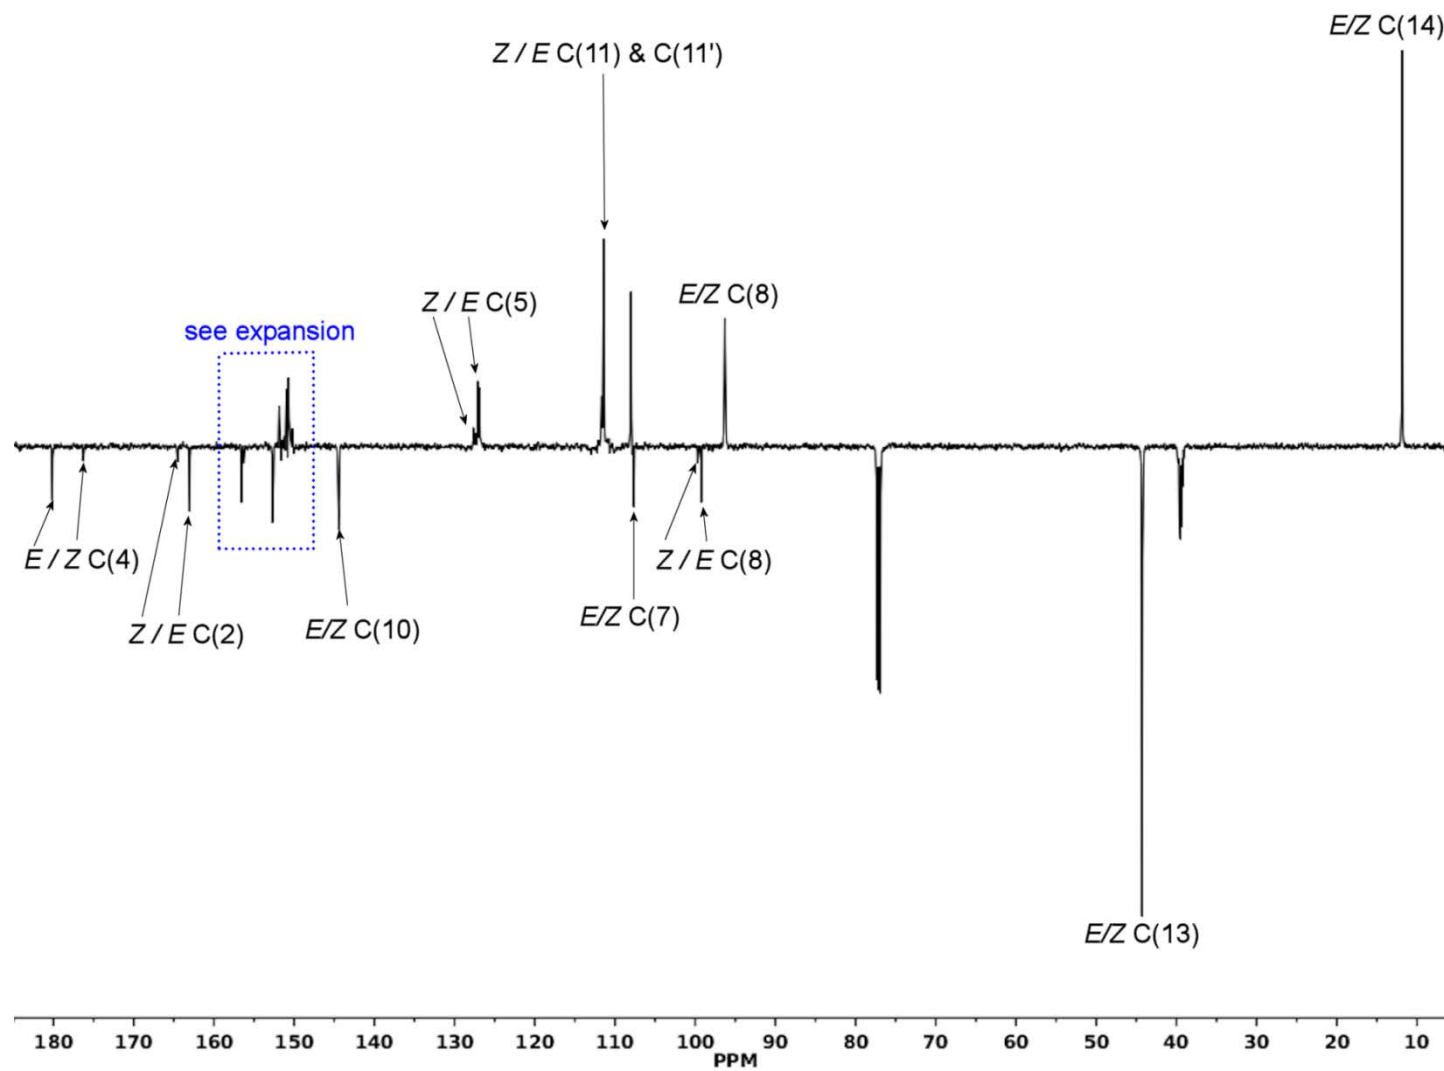

Figure S15:  $^{13}\text{C}$  APT of probe **3** in a mixture of  $\text{DMSO-}d_6$ : $\text{CHCl}_3$ - $d$  (1:7) (full spectrum).

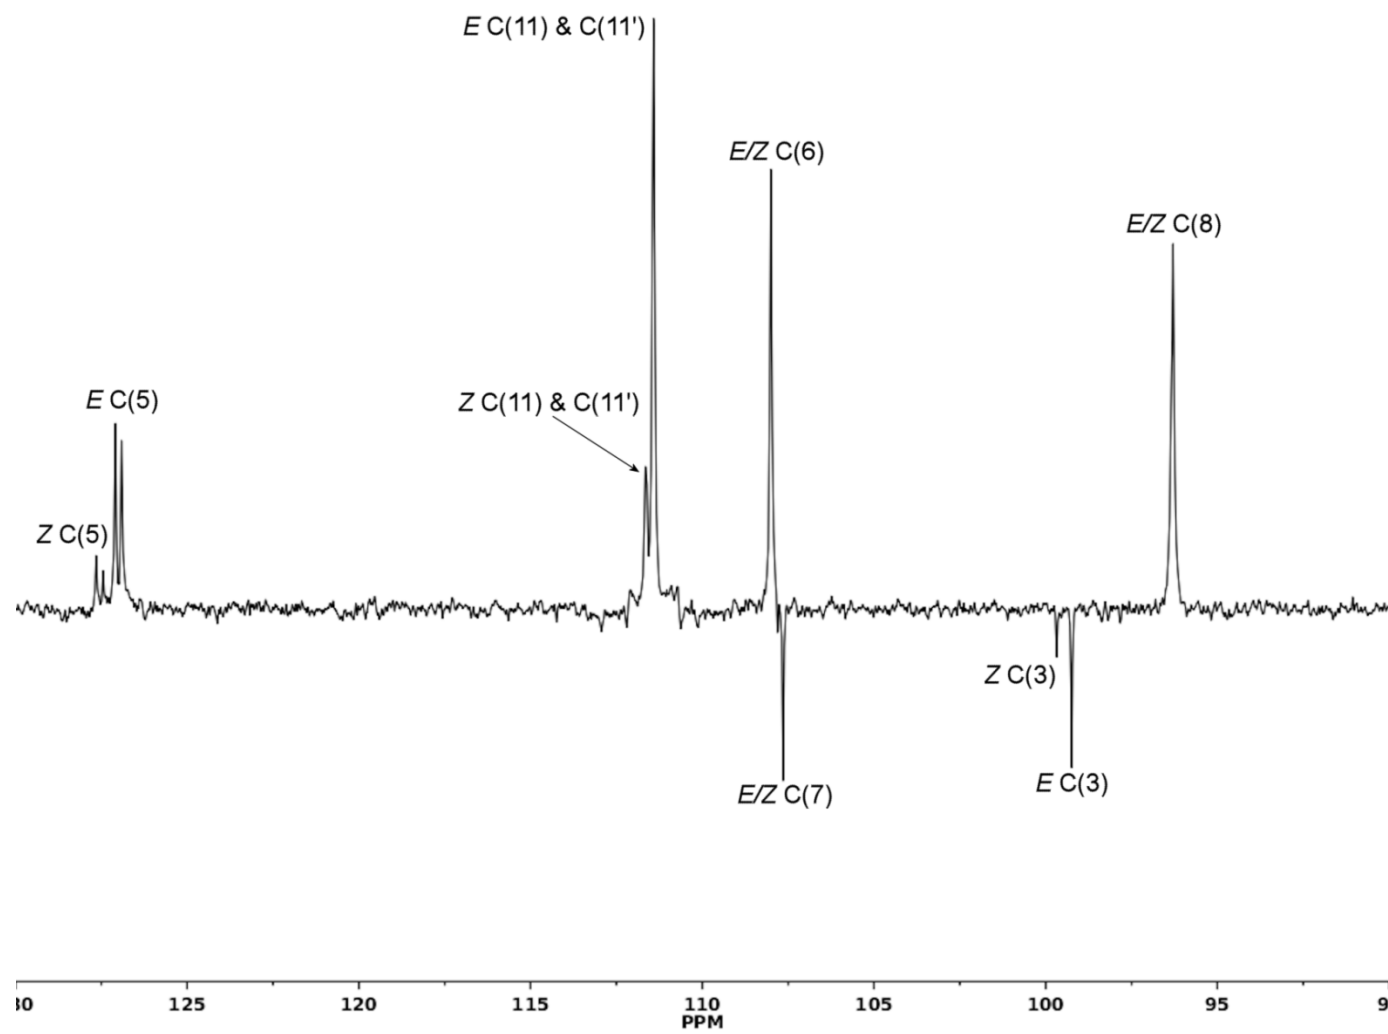

Figure S16:  $^{13}\text{C}$  APT of probe **3** in a mixture of  $\text{DMSO-}d_6$ : $\text{CHCl}_3$ - $d$  (expanded).

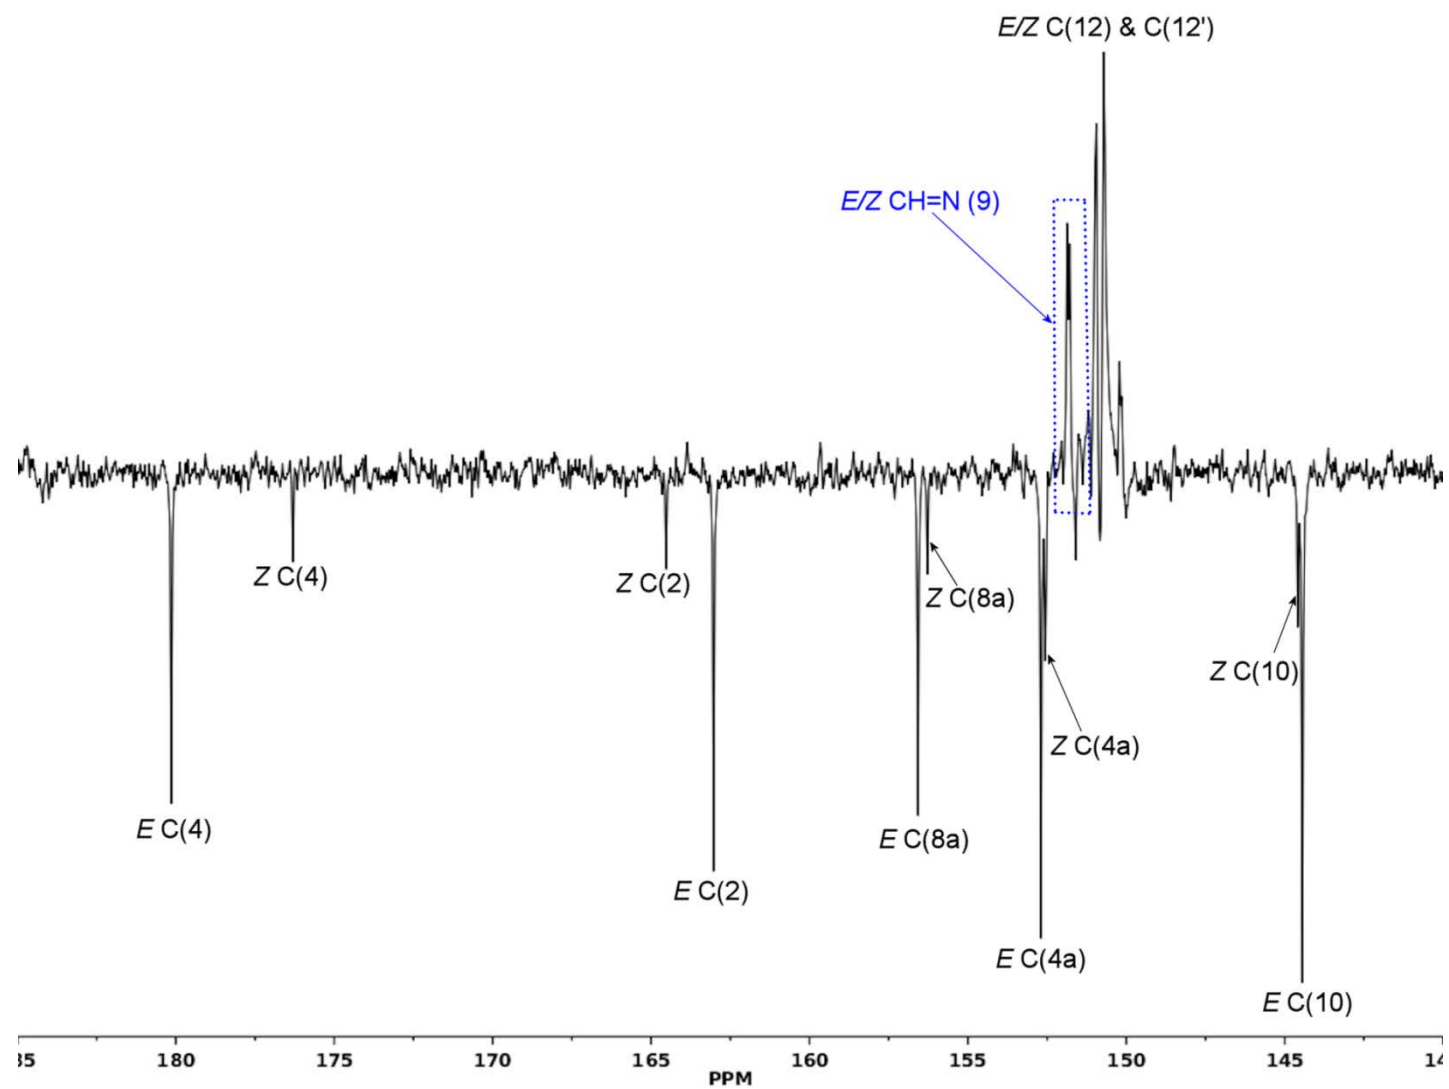

Figure S17:  $^{13}\text{C}$  APT of probe **3** in a mixture of  $\text{DMSO-}d_6$ : $\text{CHCl}_3$ - $d$  (1:7) (expanded).

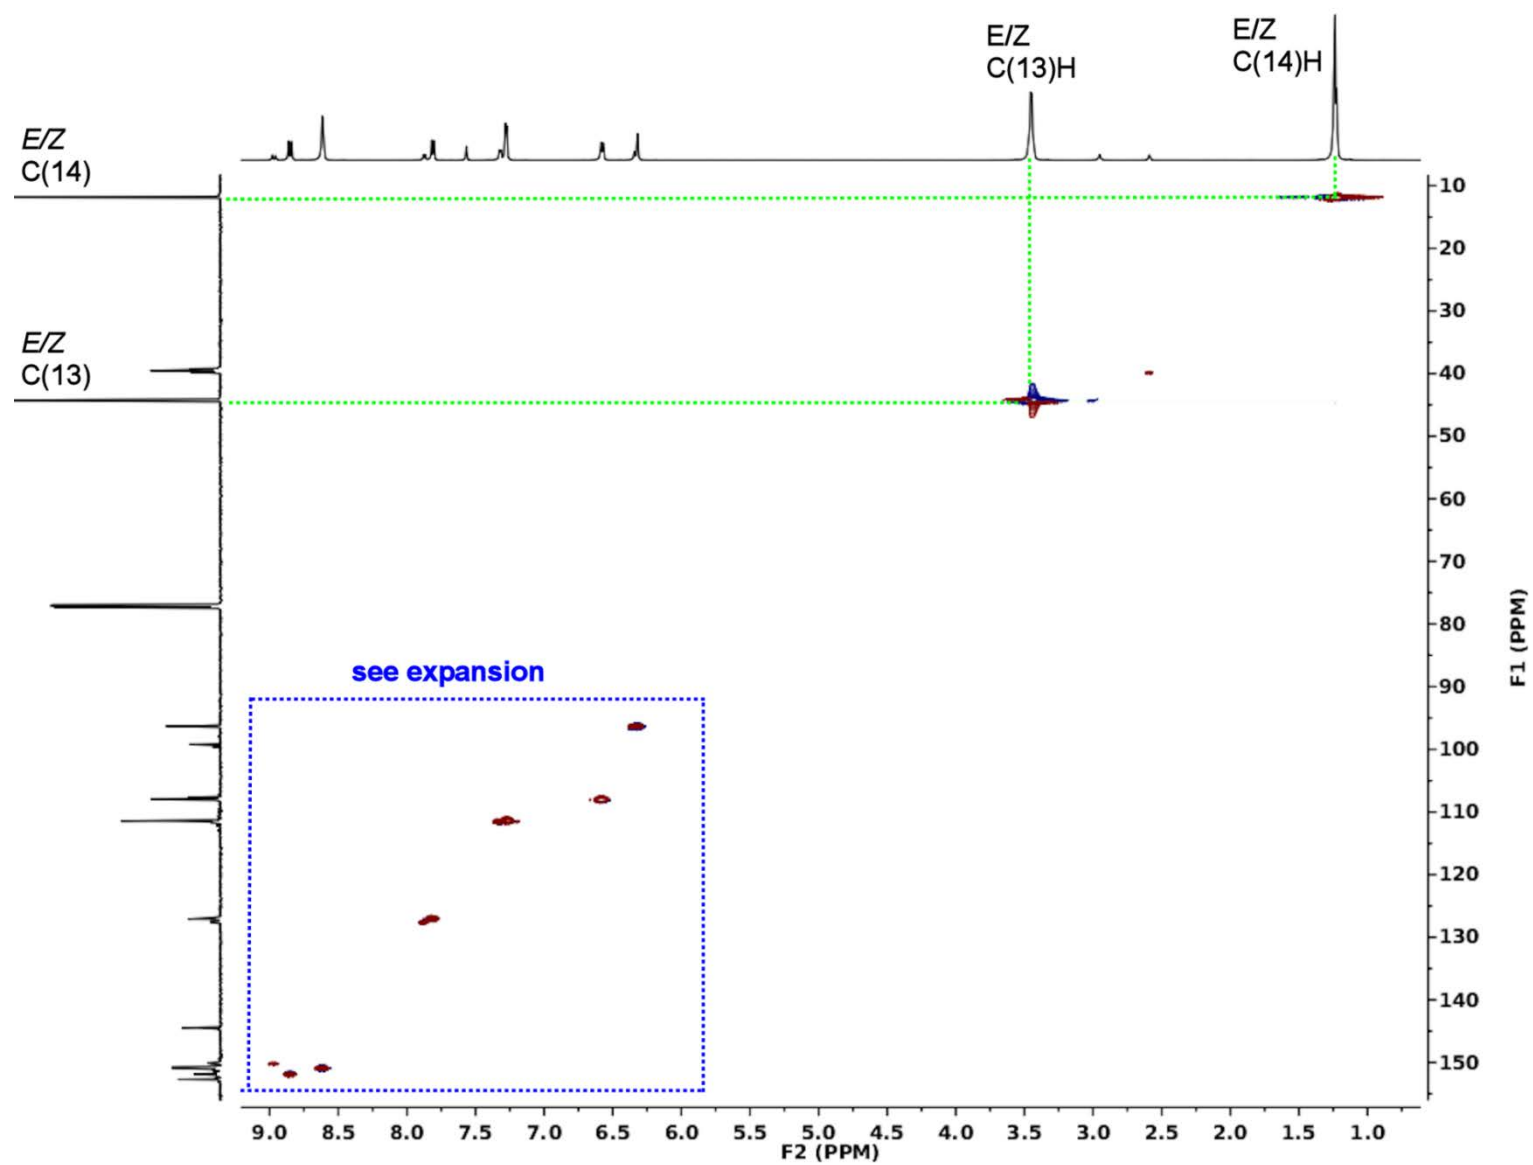

Figure S18: HSQC of probe **3** in a mixture of DMSO-*d*<sub>6</sub>:CHCl<sub>3</sub>-*d* (1:7).



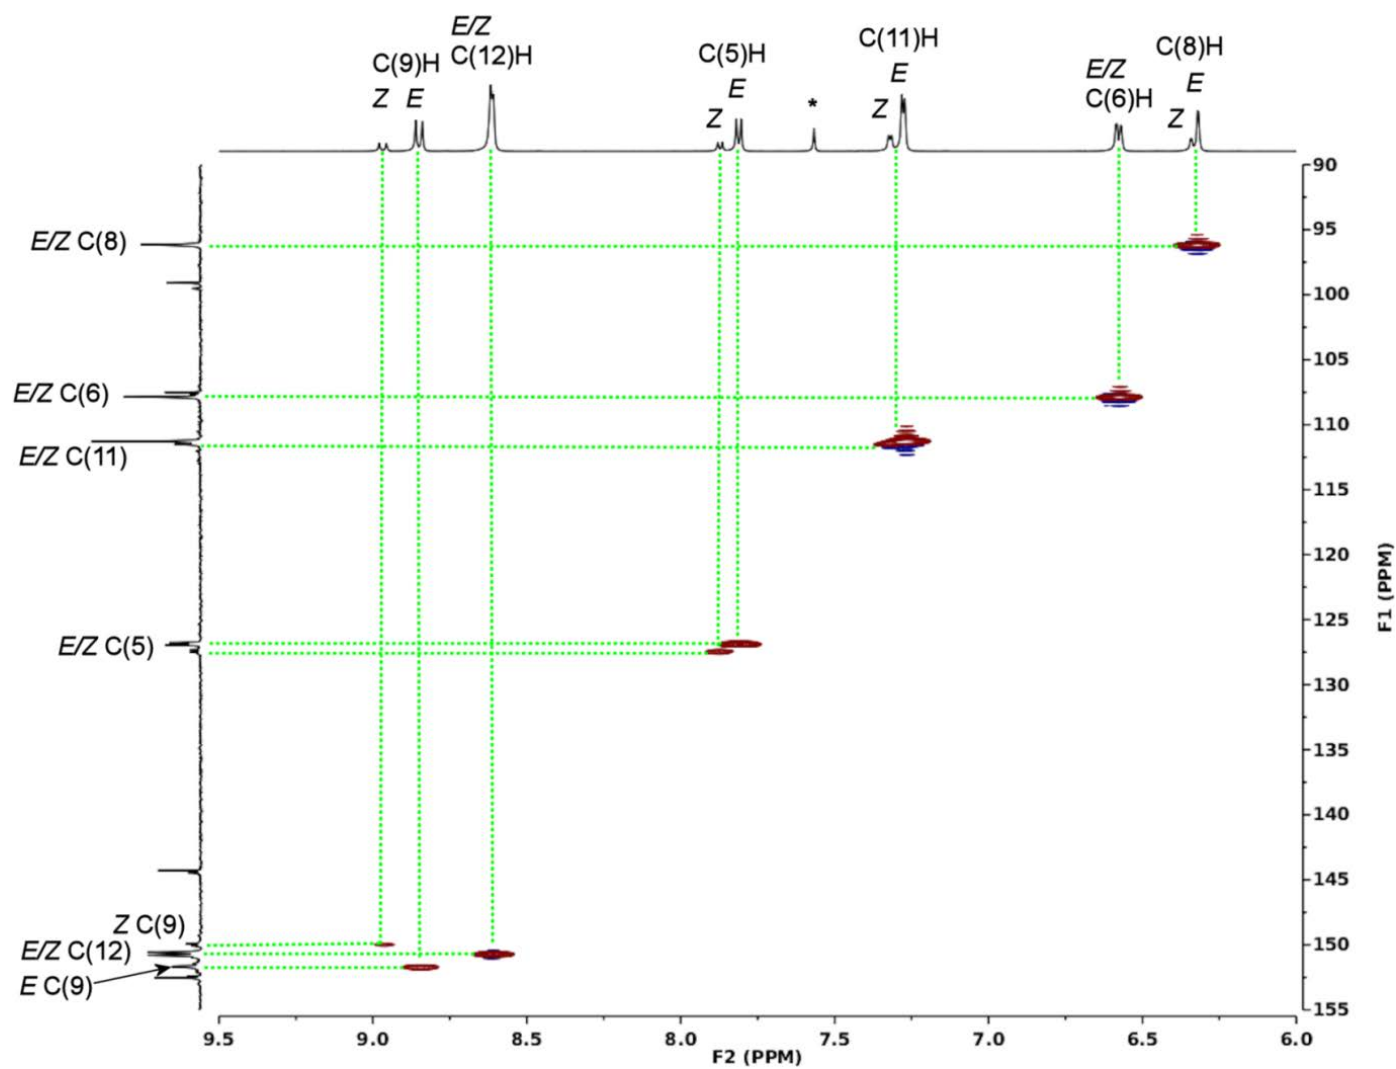

Figure S19: HSQC of probe **3** in a mixture of DMSO- $d_6$ :CHCl $_3$ - $d$  (full spectrum).

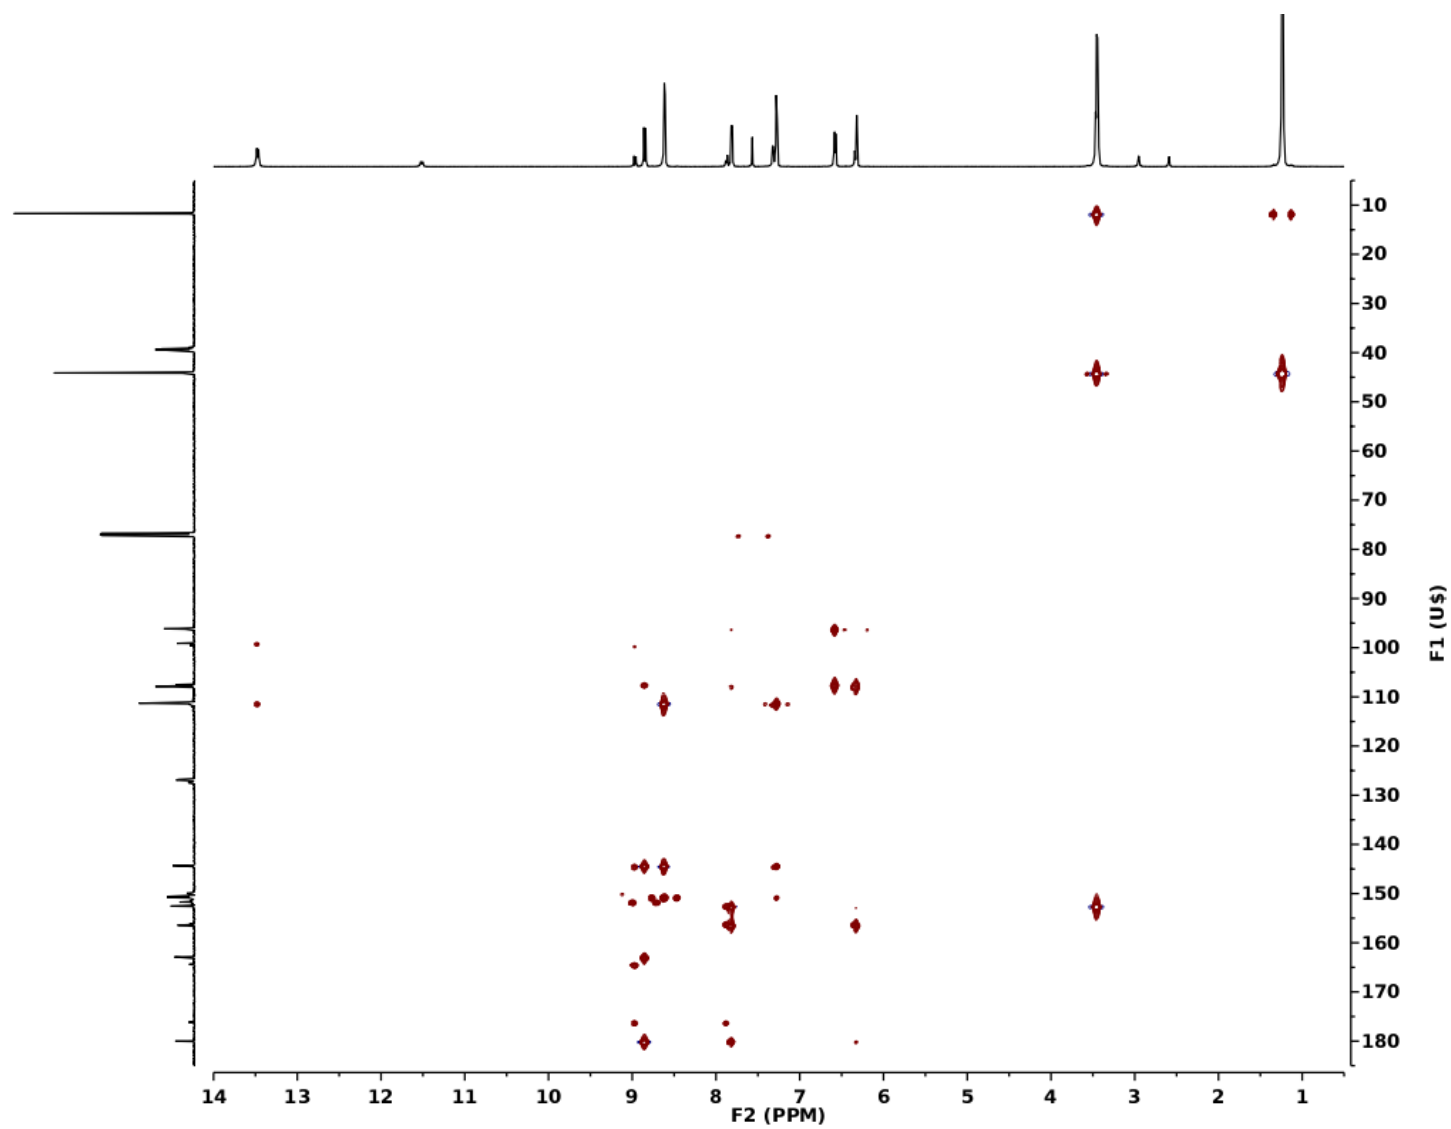

Figure S20: HMBC of probe 3 in a mixture of DMSO- $d_6$ :CHCl $_3$ - $d$  (full spectrum)

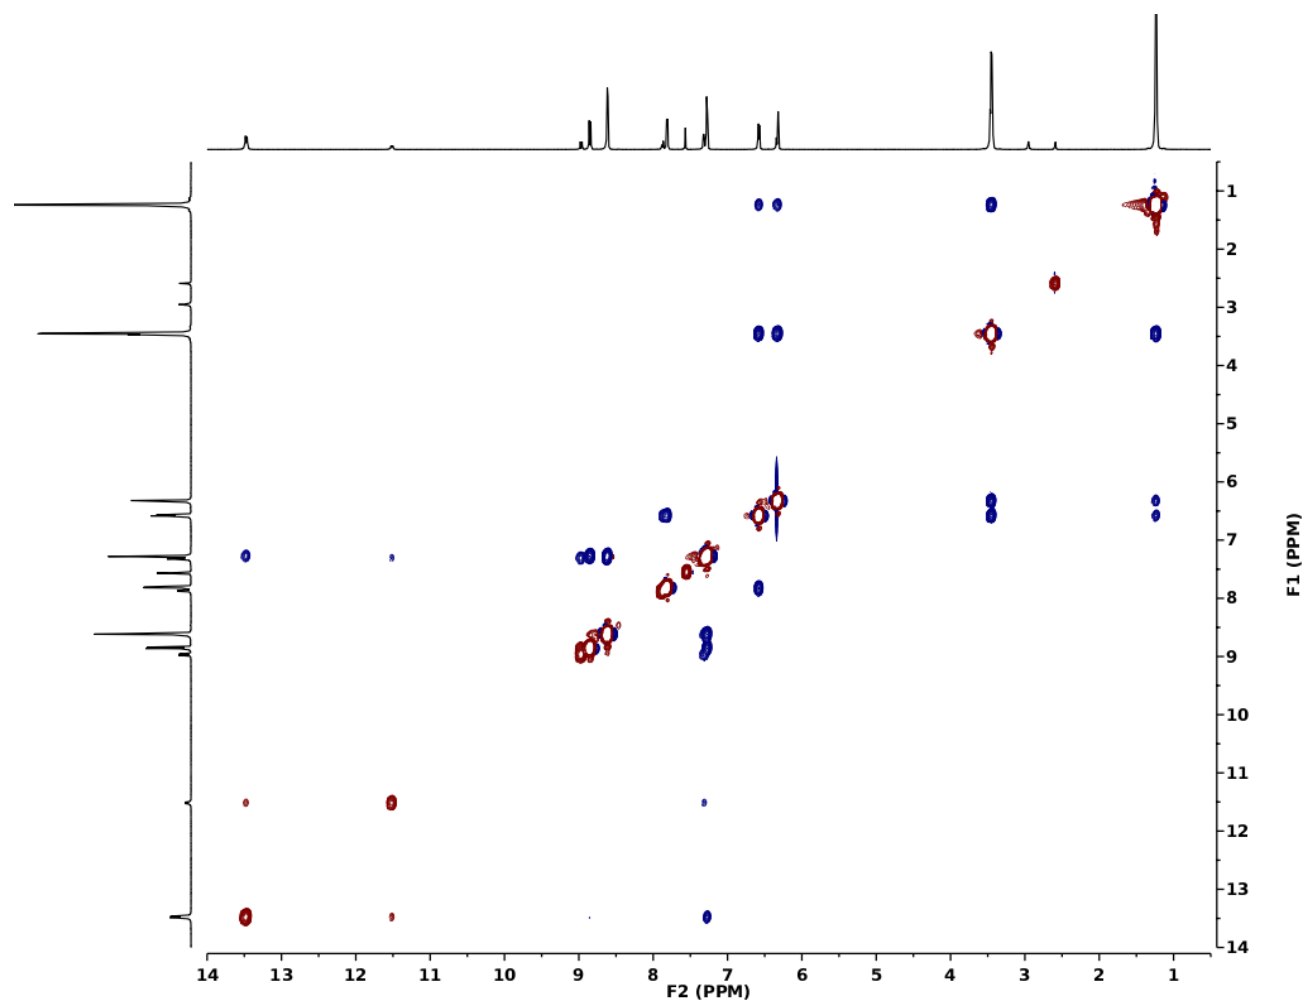

Figure S21: ROESY of probe **3** in a mixture of DMSO-*d*<sub>6</sub>:CHCl<sub>3</sub>-*d* (full spectrum).

NMR Studies of probe 3-CN adduct:

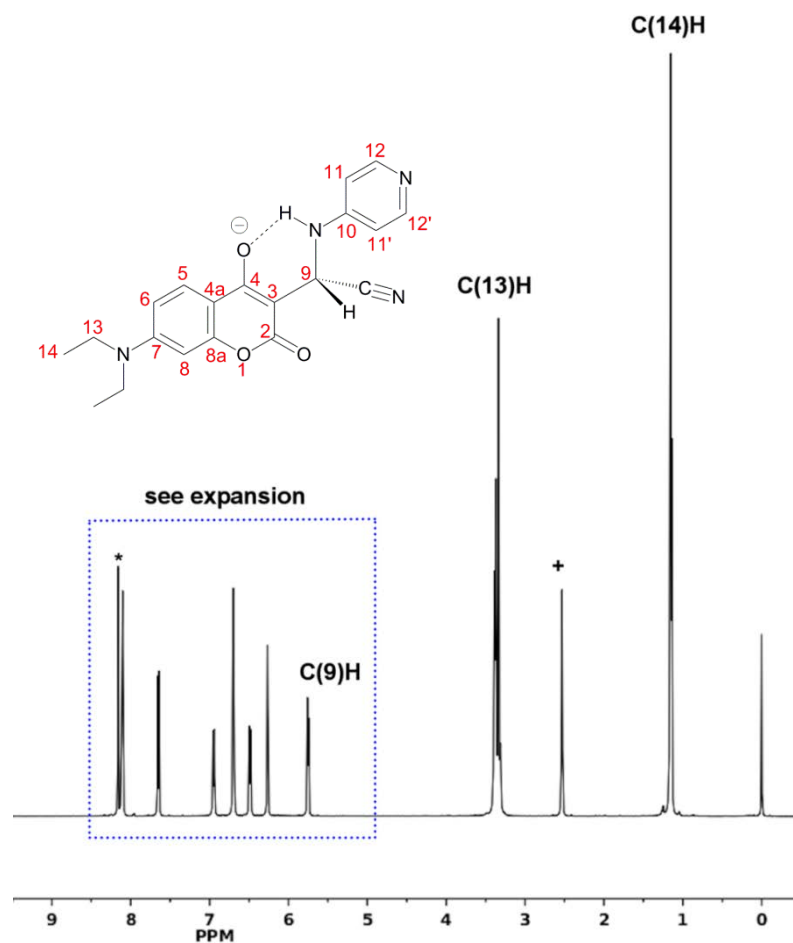

| Label  | CN-adduct                                |              |
|--------|------------------------------------------|--------------|
|        | proton (ppm, Hz)                         | carbon (ppm) |
| 2      | NA                                       | 163.6        |
| 3      | NA                                       | 88.0         |
| 4      | NA                                       | 173.3        |
| 4a     | NA                                       | 149.3        |
| 5      | 7.65 (1H, <i>d</i> , <i>J</i> = 8.8 Hz)  | 125.7        |
| 6      | 6.49 (1H, <i>d</i> , <i>J</i> = 8.7 Hz)  | 106.8        |
| 7      | NA                                       | 110.8        |
| 8      | 6.32 (1H, <i>s</i> )                     | 96.1         |
| 8a     | NA                                       | 155.4        |
| 9      | 5.75 (1H, <i>d</i> , <i>J</i> = 8.5 Hz)  | 125.3        |
| 10     | NA                                       | 151.5        |
| 11/11' | 6.70 (2H, <i>d</i> , <i>J</i> = 5.50 Hz) | 107.7        |
| 12/12' | 8.11 (2H, <i>d</i> , <i>J</i> = 5.6 Hz)  | 149.1        |
| 13     | 1.15 (4H, <i>d</i> , <i>J</i> = 7.0 Hz)  | 43.7         |
| 14     | 1.15 (6H, <i>t</i> , <i>J</i> = 7.0 Hz)  | 12.02        |
| -CN    |                                          | 119.5        |
| -NH    | 6.95 (1H, <i>d</i> , <i>J</i> = 8.8 Hz)  | NA           |

Figure S22:  $^1\text{H}$  NMR of probe **3** in a mixture of  $\text{DMSO-}d_6$ : $\text{CHCl}_3$ -*d* (1.5:1); Table S5: the chemical shifts, coupling constants (*J* in Hz) for the cyanide adduct.

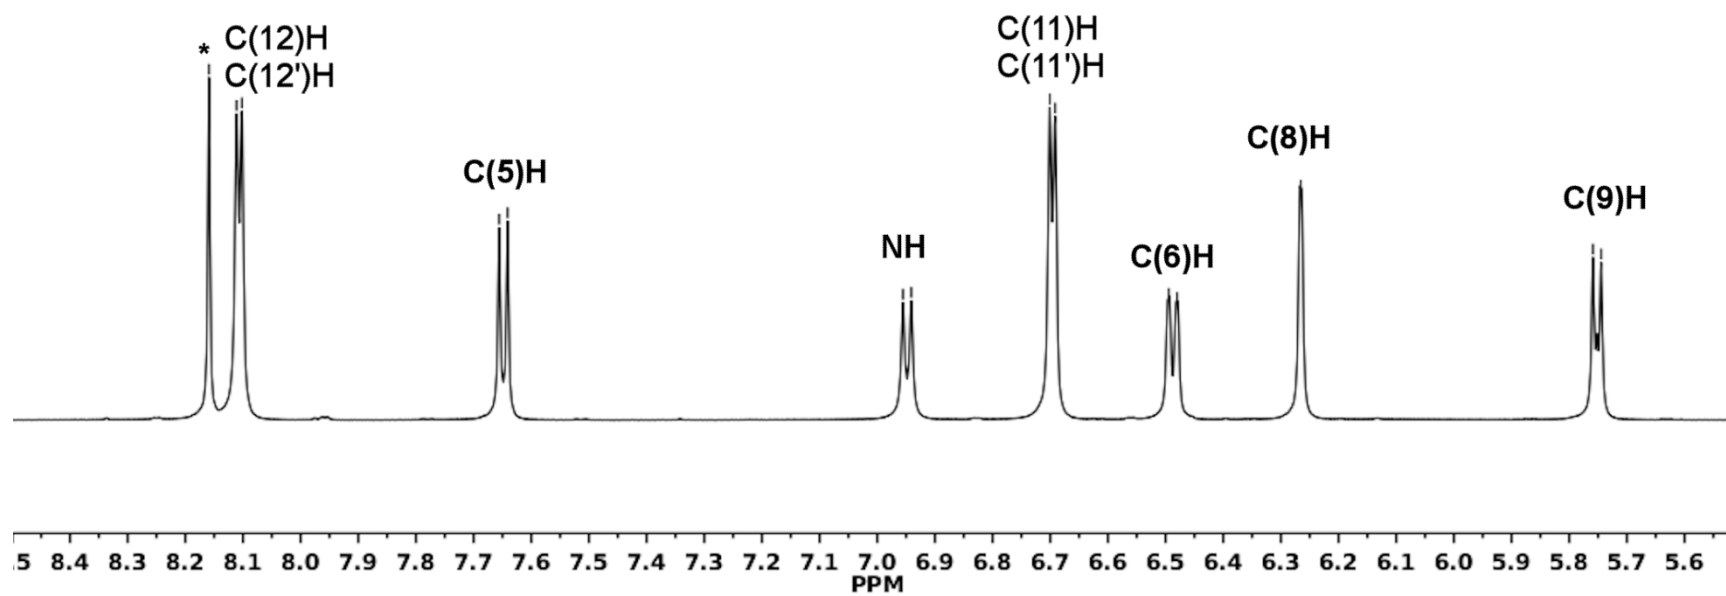

Figure S23:  $^1\text{H}$  NMR of probe 3 in a mixture of  $\text{DMSO-}d_6$ : $\text{CHCl}_3-d$  (1.5:1).

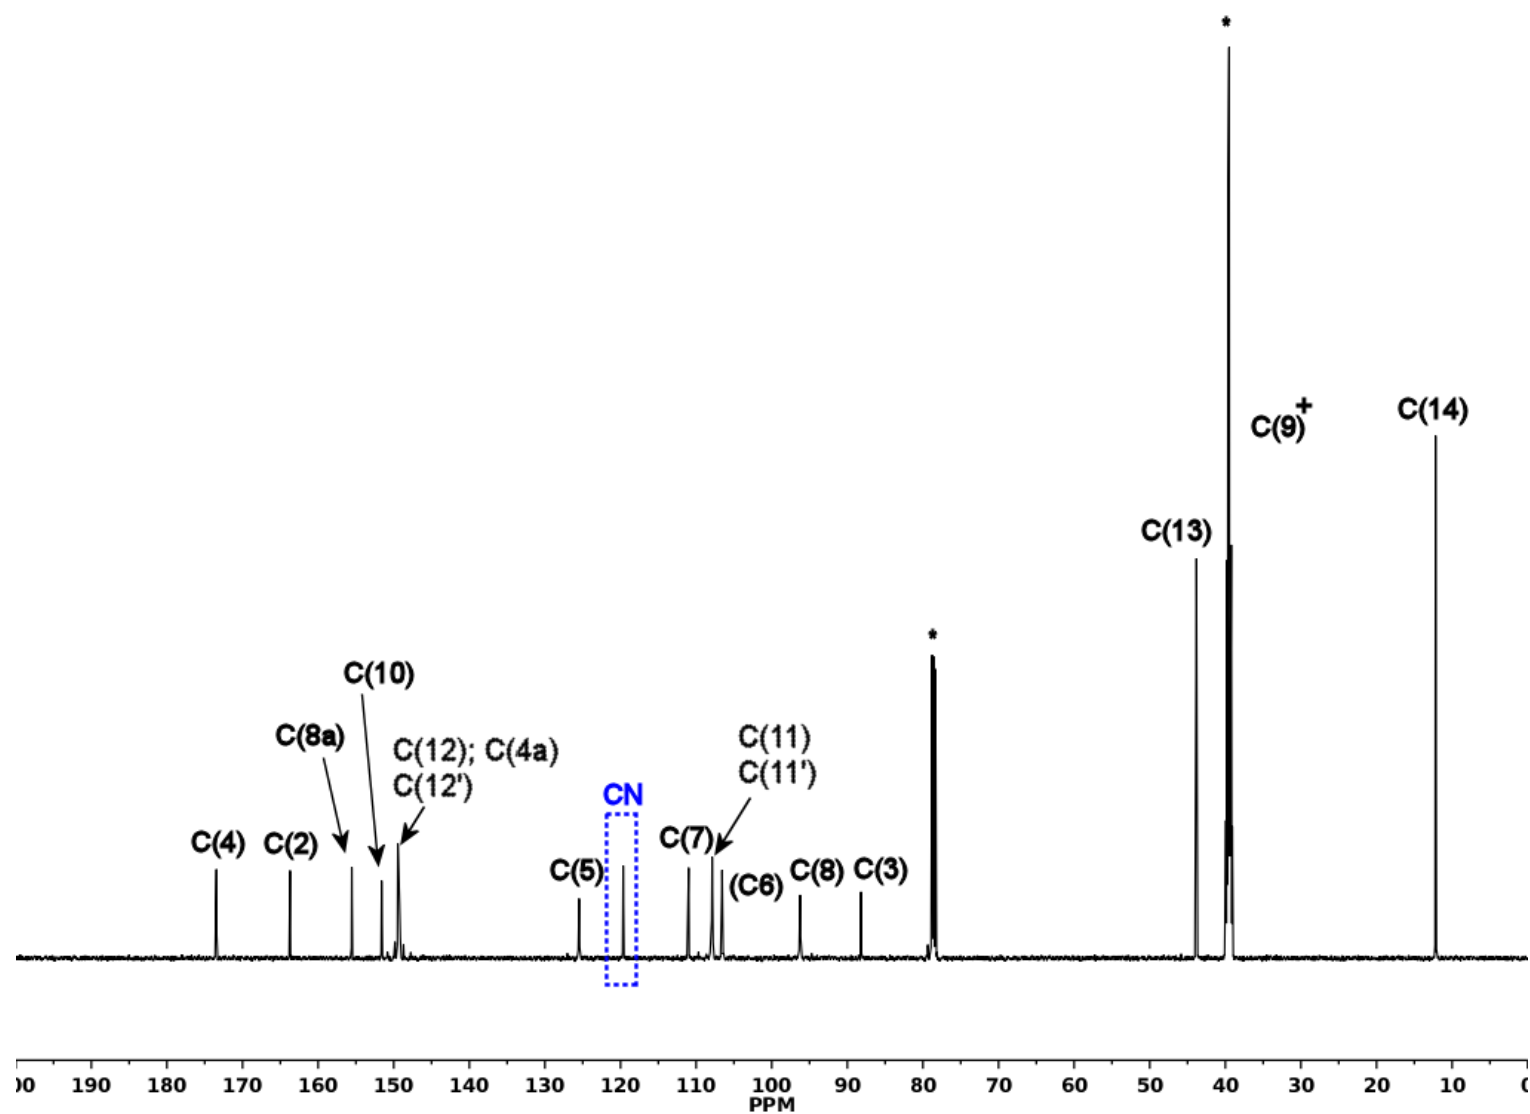

Figure S24:  $^{13}\text{C}$  NMR spectrum (full sweep-width) of probe **3** in a mixture of  $\text{DMSO-}d_6$ : $\text{CHCl}_3$ - $d$  (1.5:1).

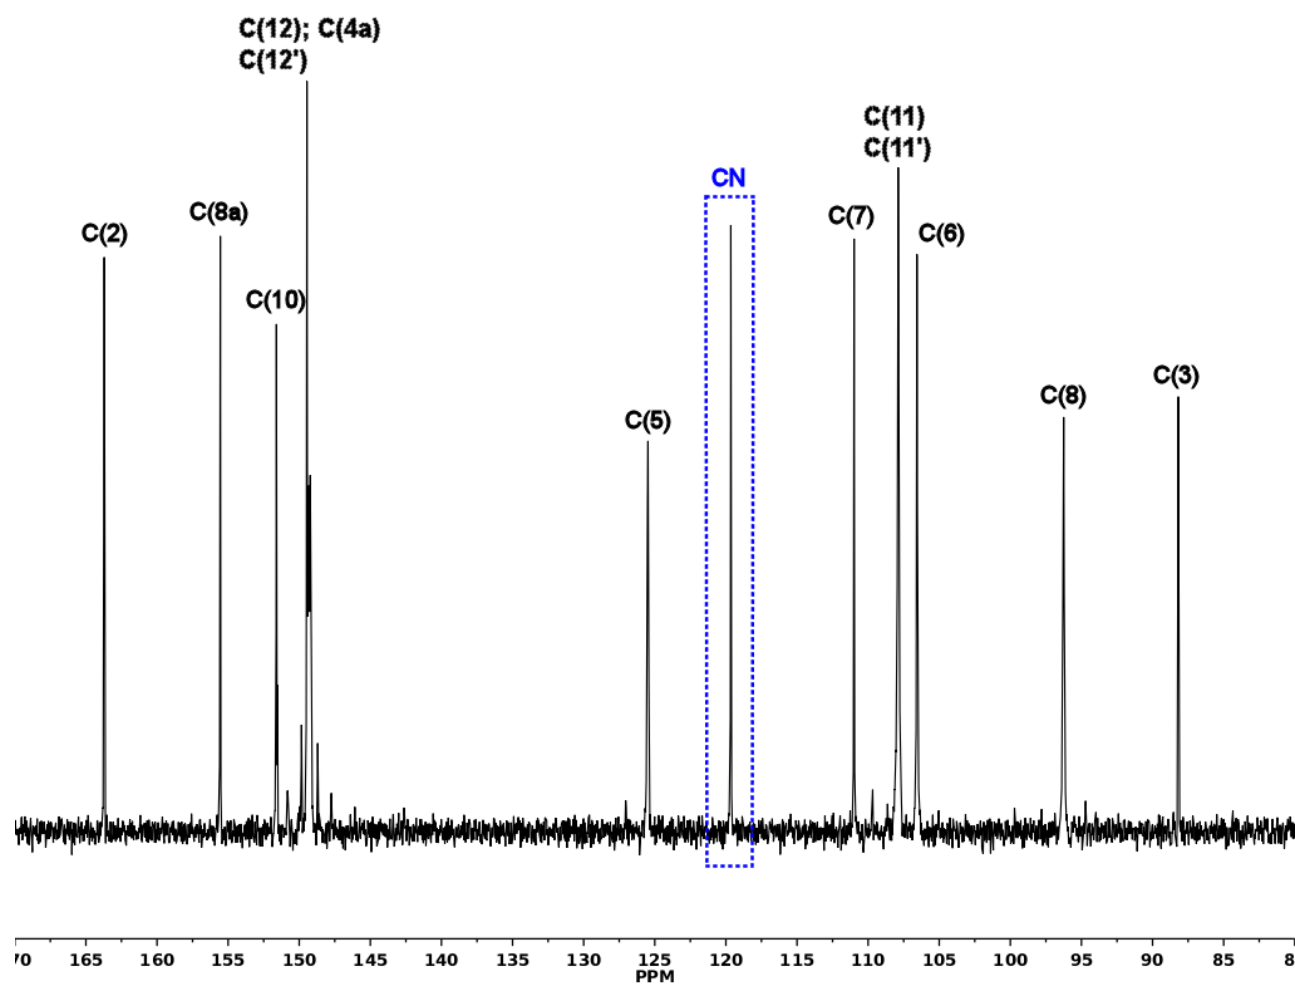

Figure S25:  $^{13}\text{C}$  NMR spectrum (expanded) of probe 3 in a mixture of  $\text{DMSO-}d_6$ : $\text{CHCl}_3$ - $d$  (1.5:1).

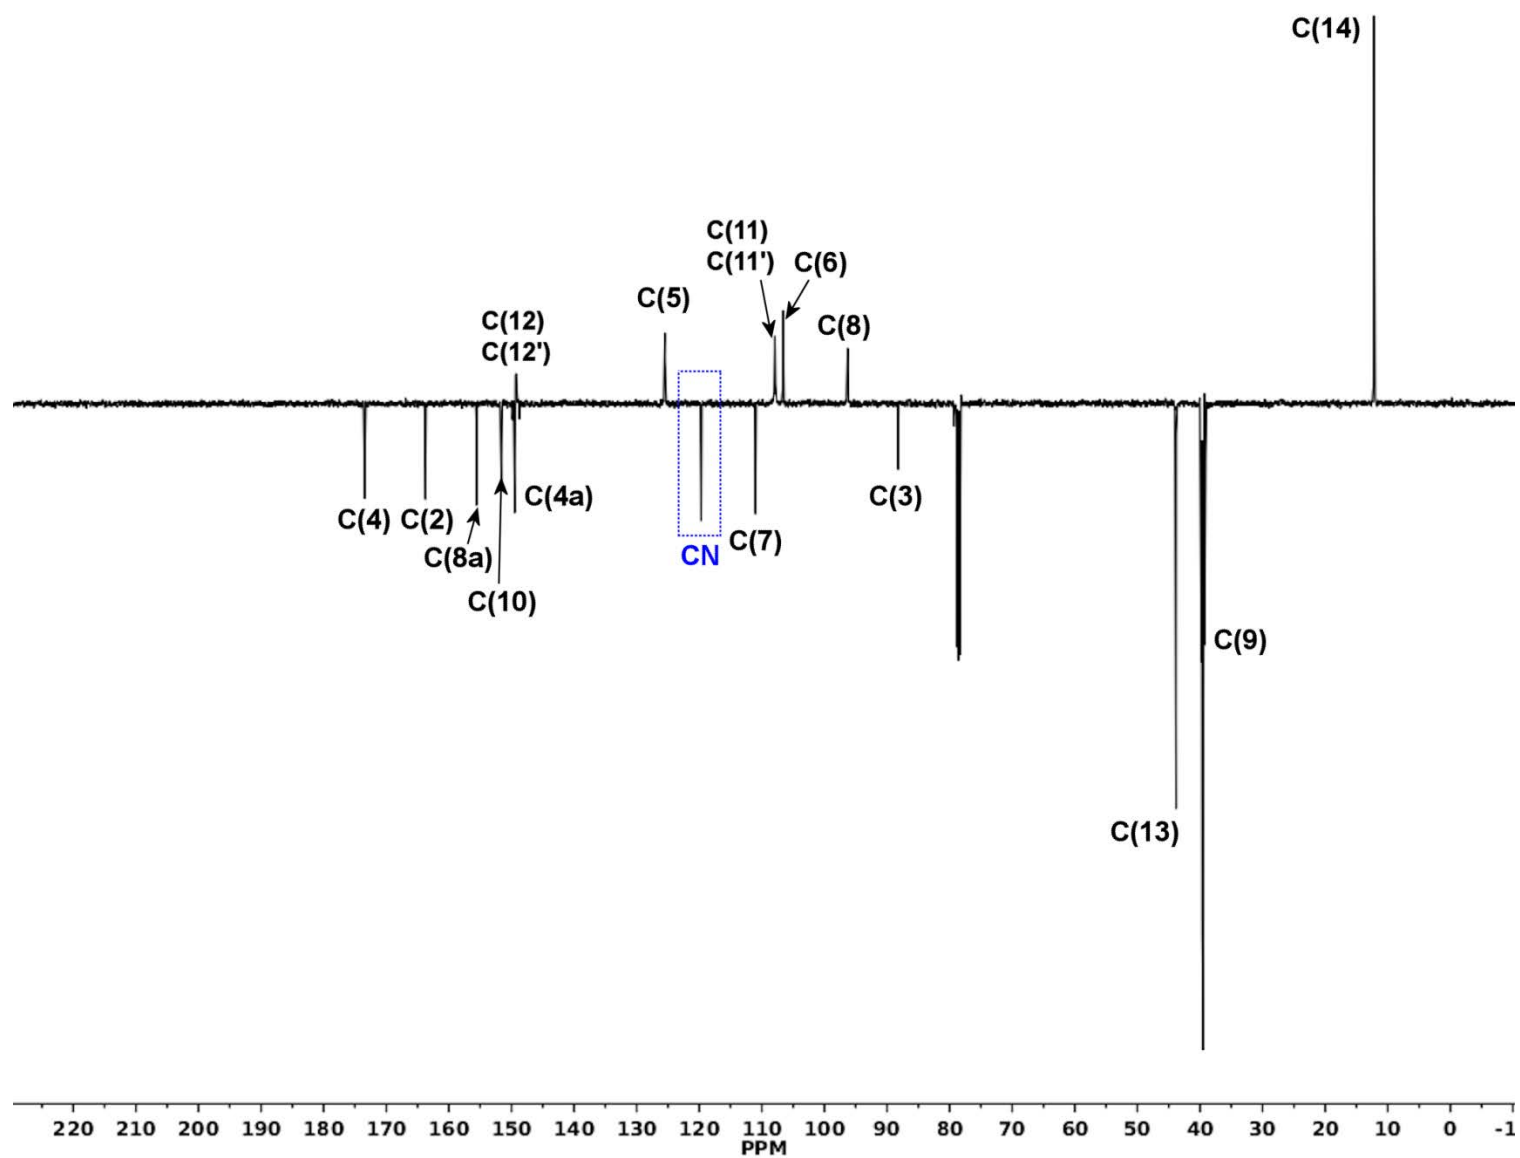

Figure S26: <sup>13</sup>C APT spectrum (full sweep-width) of probe **3** in a mixture of DMSO-*d*<sub>6</sub>:CHCl<sub>3</sub>-*d* (1.5:1).



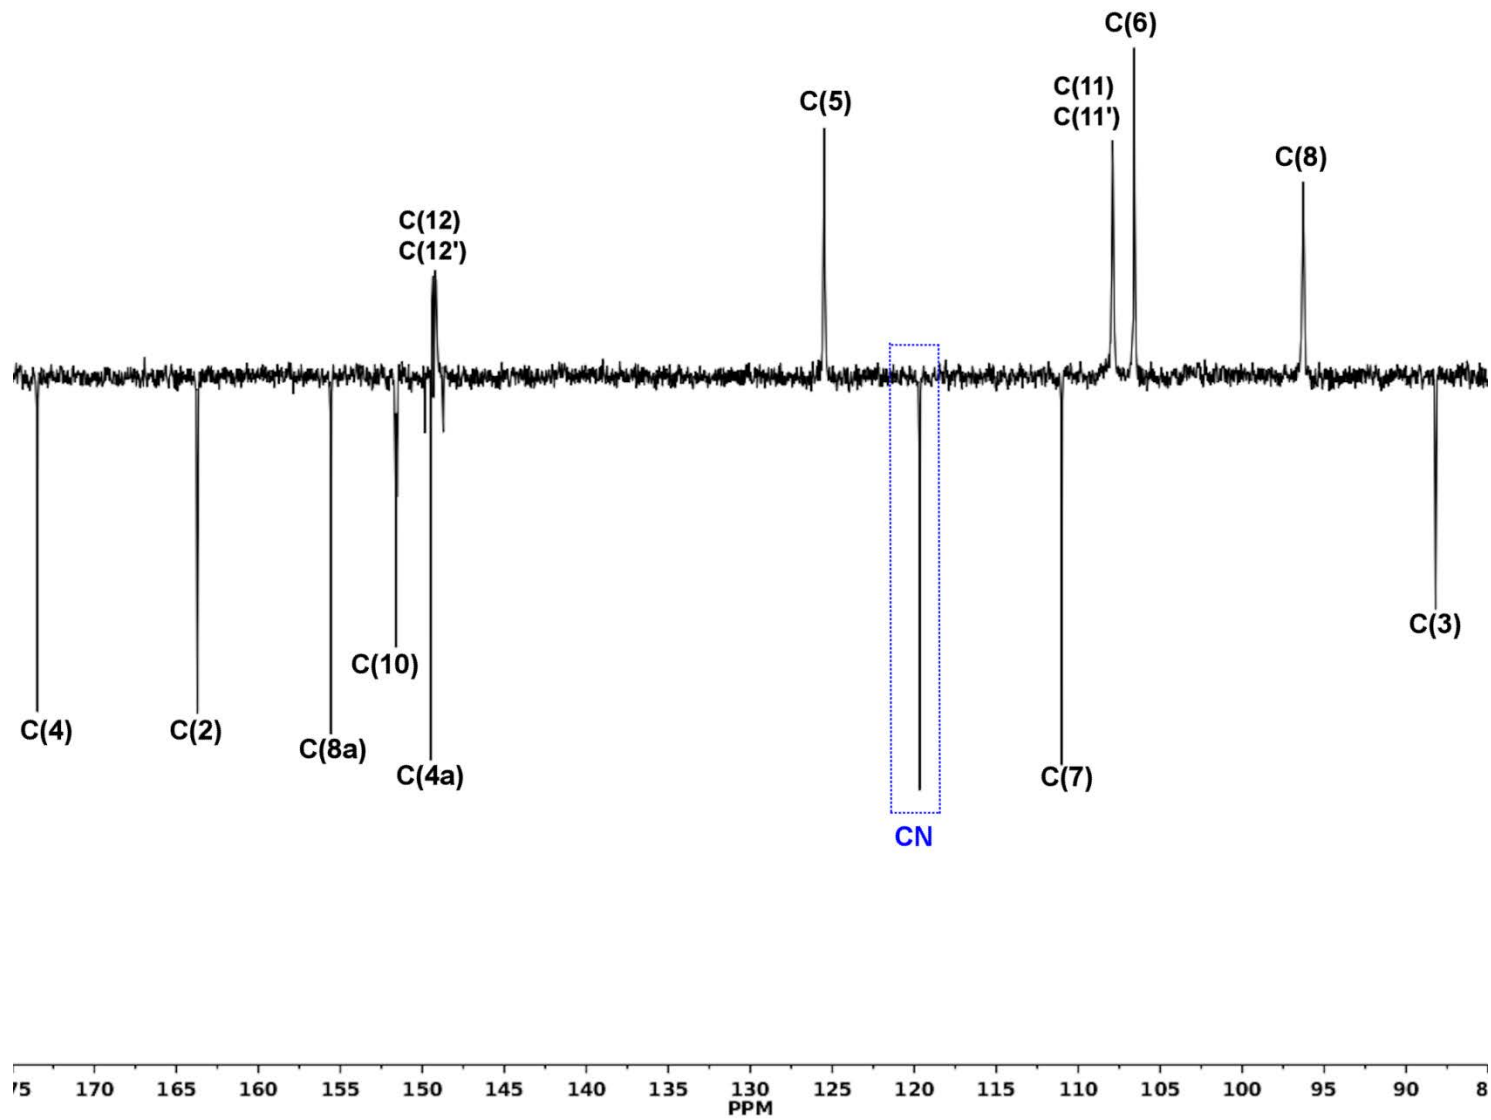

Figure S27:  $^{13}\text{C}$  APT spectrum (expanded) of probe **3** in a mixture of  $\text{DMSO-}d_6$ : $\text{CHCl}_3$ - $d$  (1.5:1).

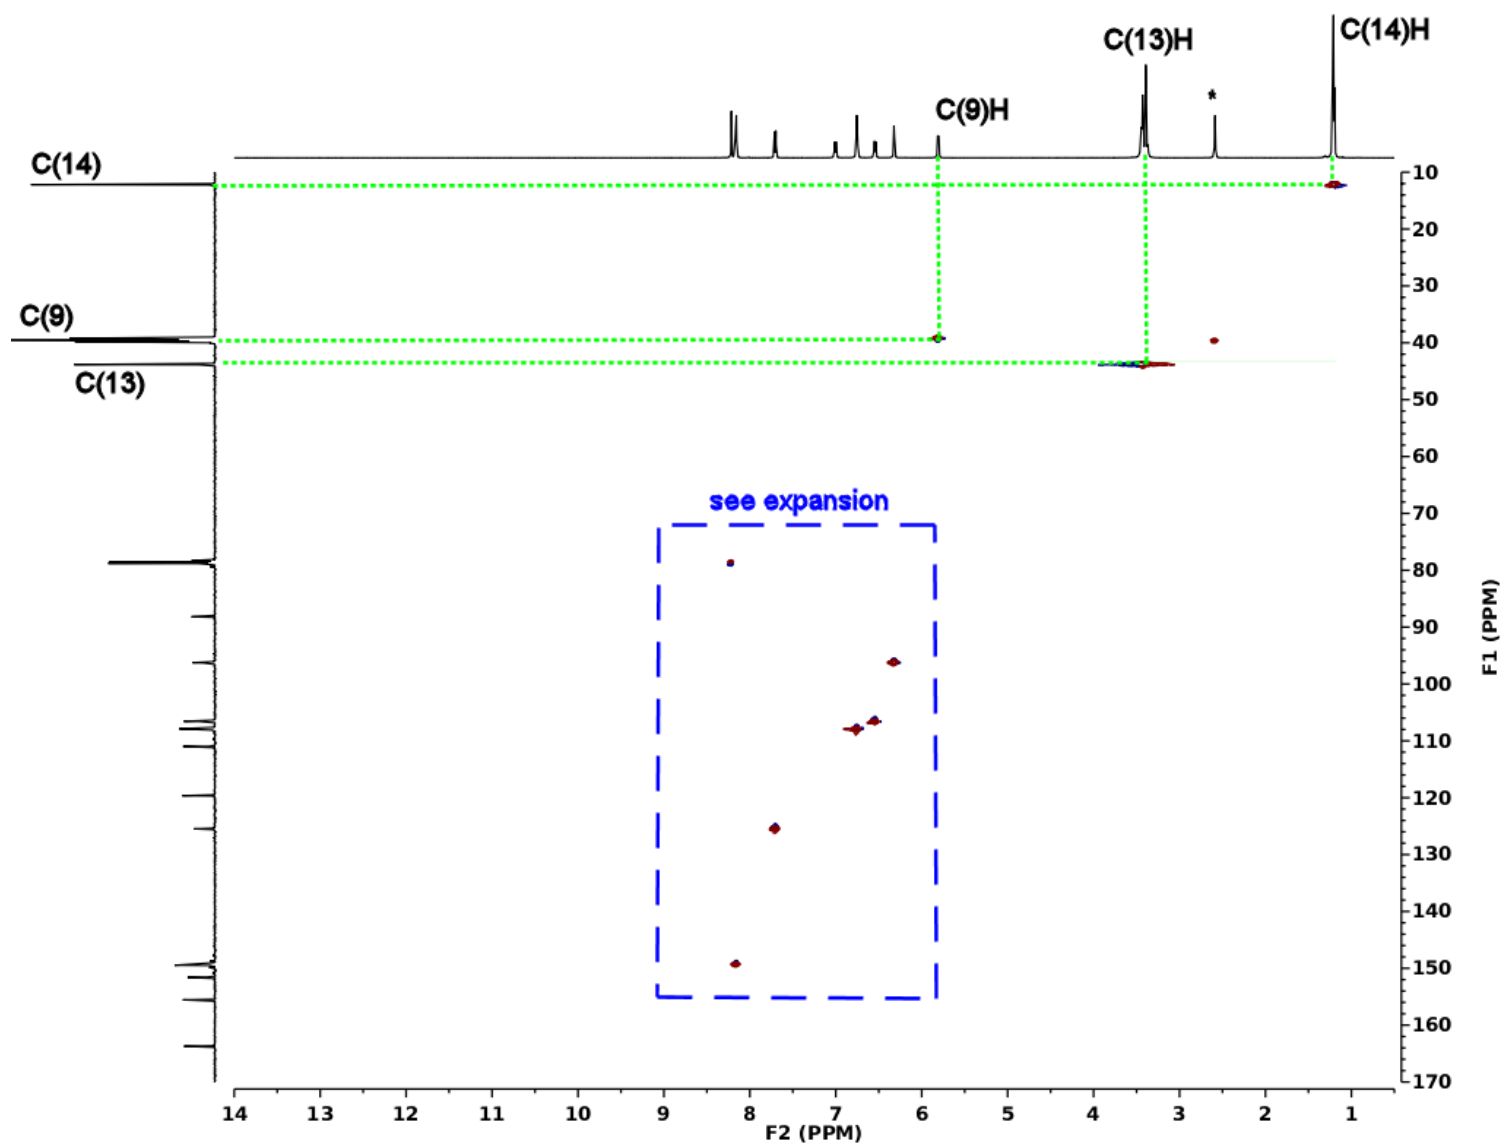

Figure S28: HSQC spectrum (full sweep-width) of probe **3** in a mixture of DMSO-*d*<sub>6</sub>:CHCl<sub>3</sub>-*d* (1.5:1).

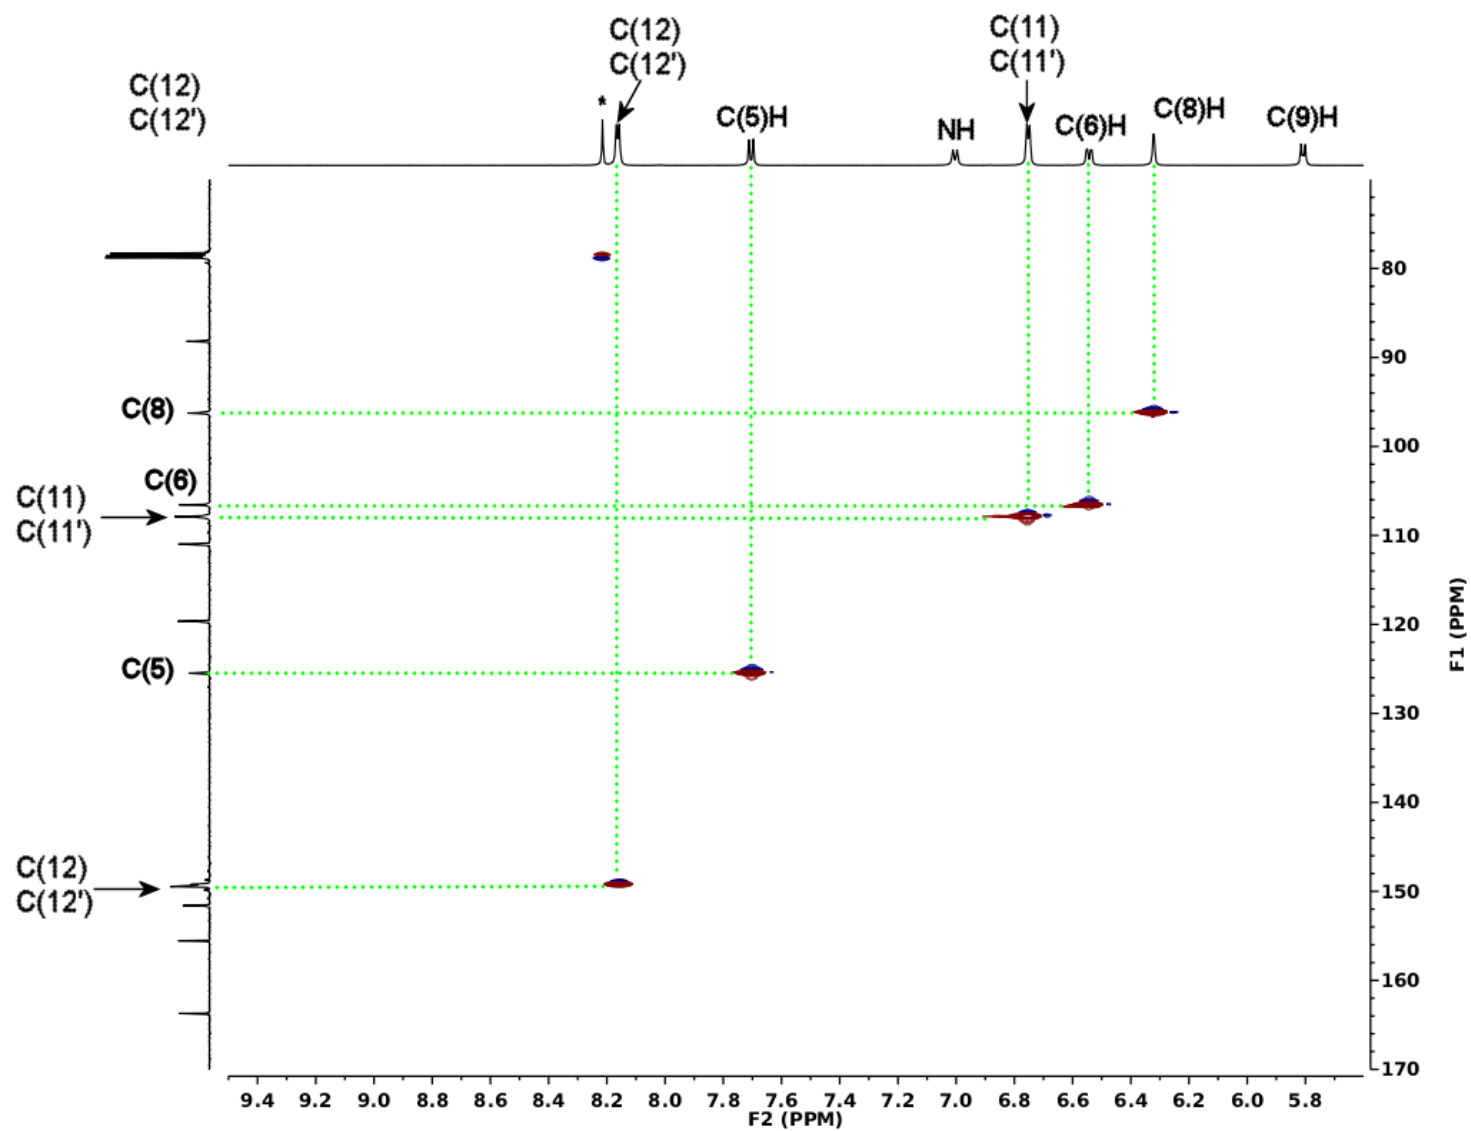

Figure S29: HSQC spectrum (expanded) of probe **3** in a mixture of DMSO- $d_6$ :CHCl $_3$ - $d$  (1.5:1).

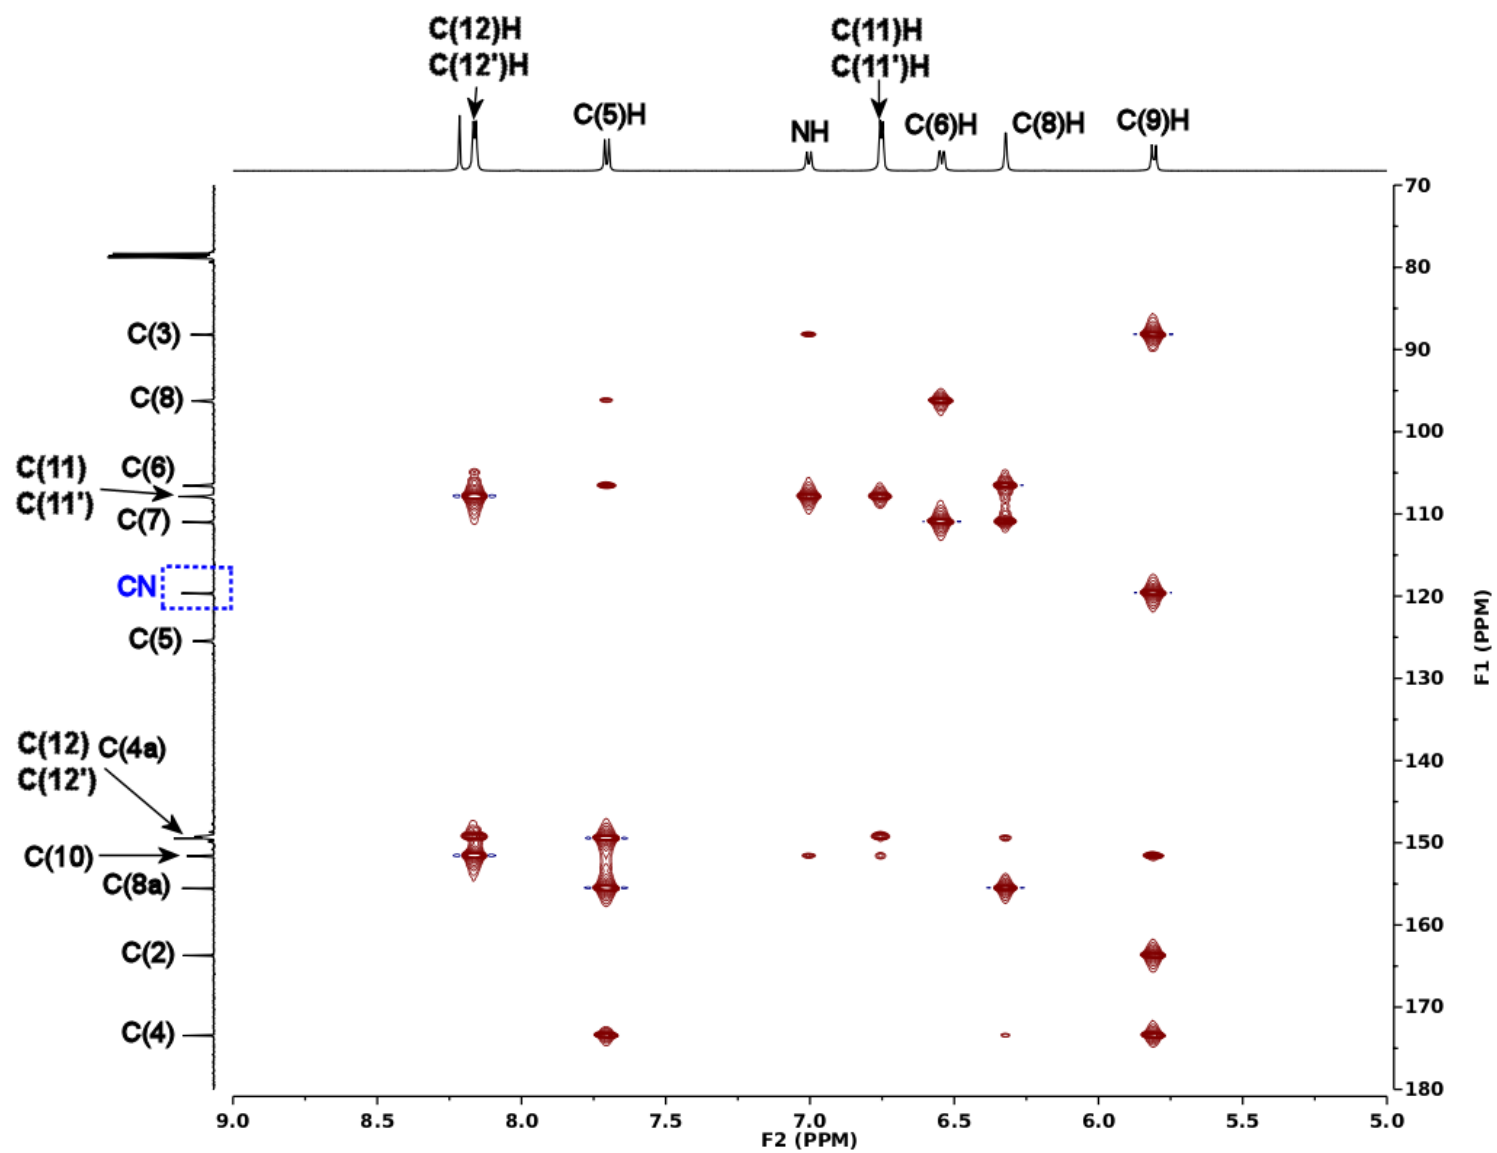

Figure S30: HMBC spectrum (expanded) of probe **3** in a mixture of DMSO- $d_6$ :CHCl $_3$ - $d$  (1.5:1).

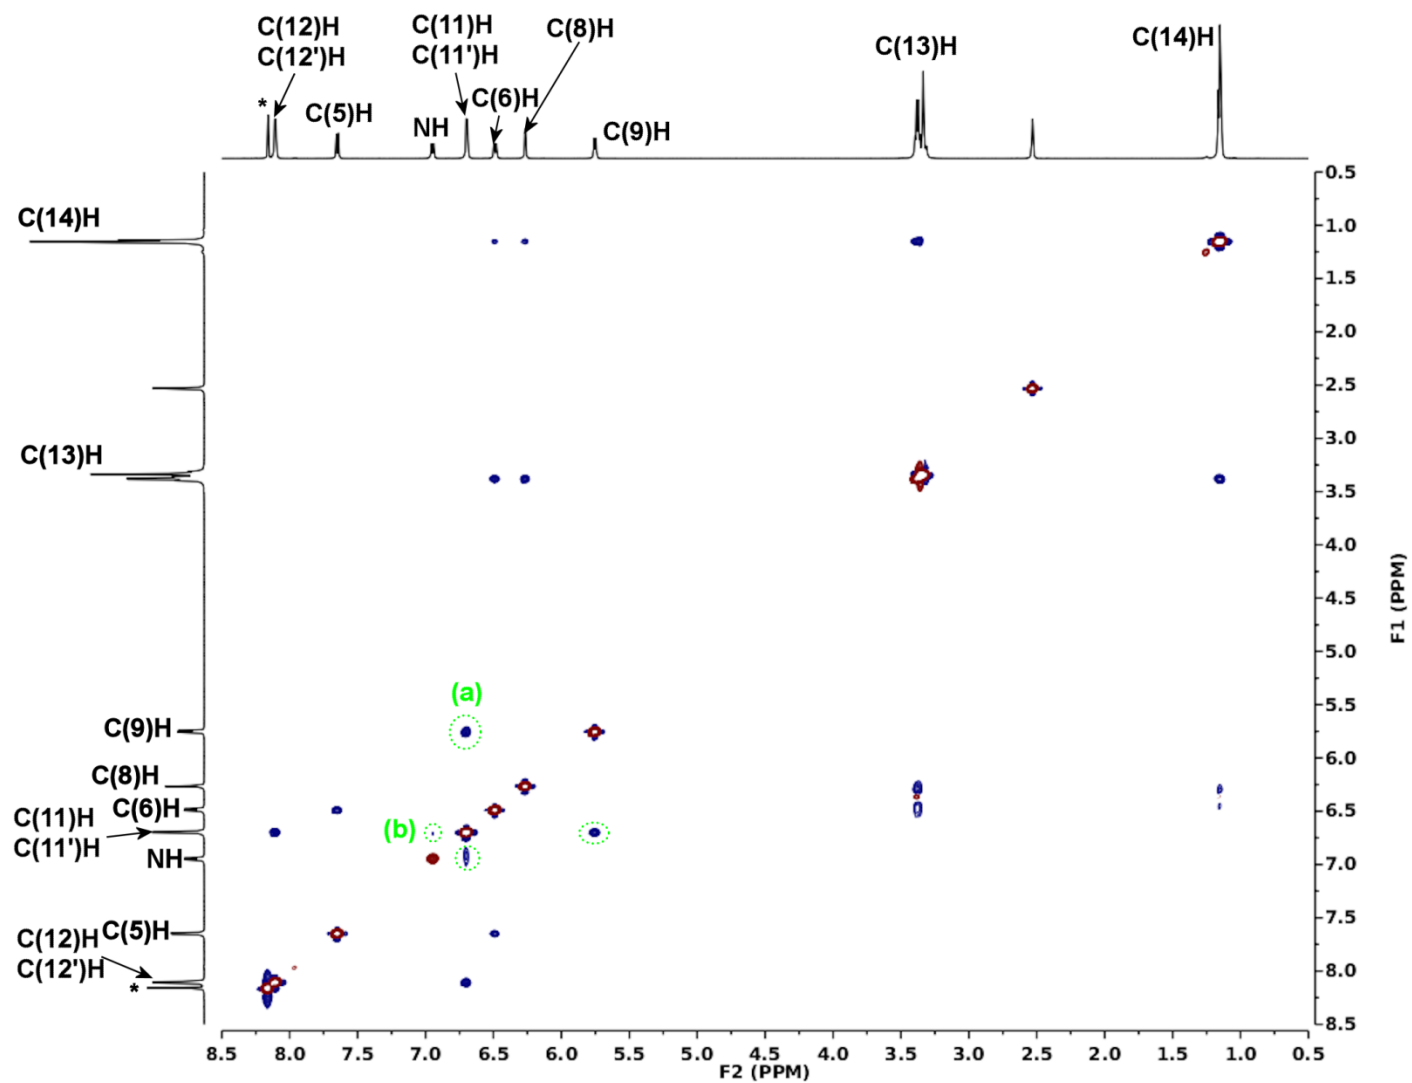

Figure S31: ROESY spectrum (full sweep-width) of probe **3** in a mixture of DMSO- $d_6$ :CHCl $_3$ - $d$  (1.5:1).

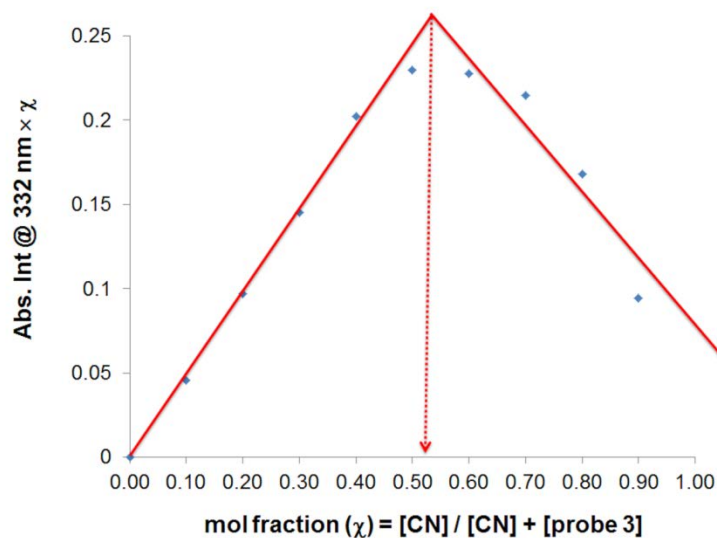

Figure S32: Job's plot showing a 1:1 adduct.

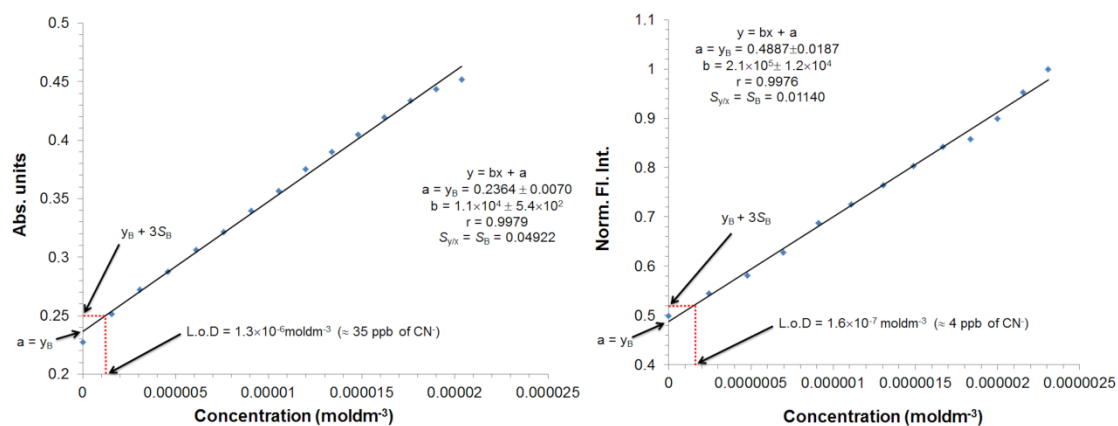

Figure S33: Calibration curve used to calculate the limit of detection CN<sup>-</sup> using UV-Vis (left) and fluorescence (right) spectroscopy of probe **3**.

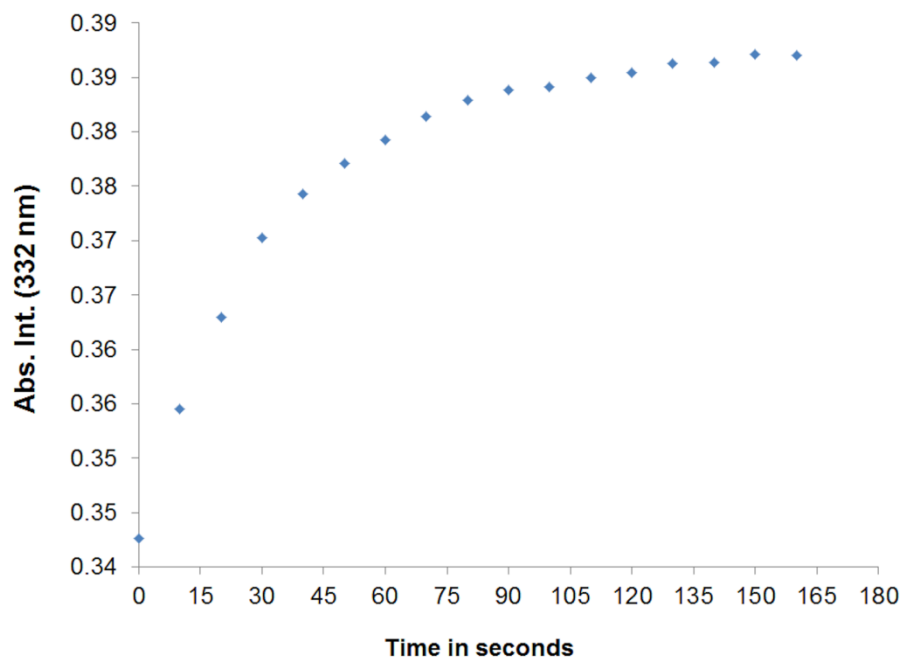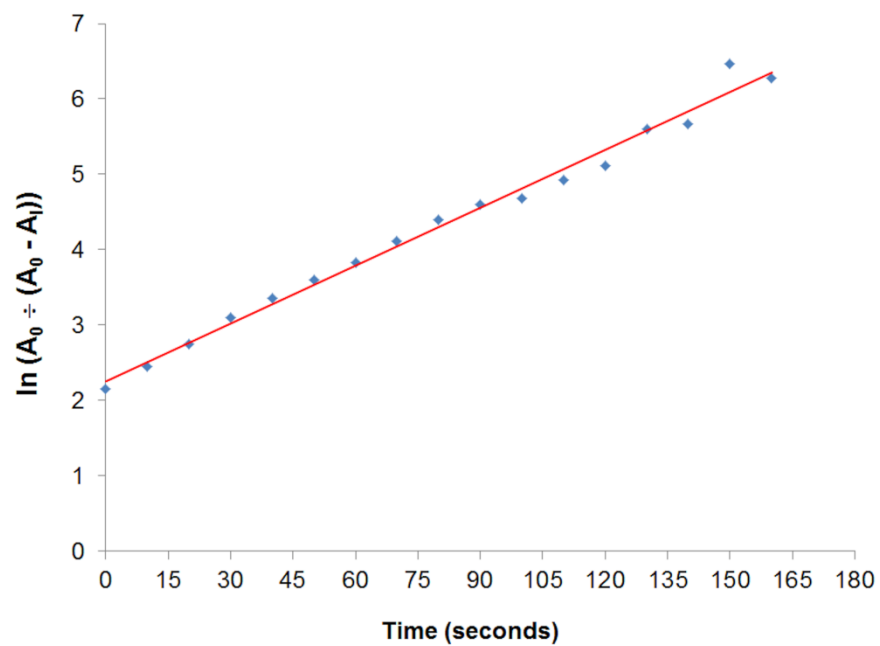

Figure S34: (Top) Absorbance intensity increase upon the cyanide addition to molecular probe **3**, (Bottom) pseudo-first order kinetic plot  $\ln(A_0/(A_0-A_t))$

## Molecular Modelling

### Experimental

**Computational methods:** Structure **A** was constructed using the 'Build' option in *Spartan '14*<sup>2</sup> installed on a desktop computer equipped with Intel Xenon Dual Quad Core CPUs running at 2.33 GHz. Analysis of 144 conformers resulted in two groups being retained: a cluster of 14 very similar structures within 7.6 kJmol<sup>-1</sup> of the lowest energy conformer a second cluster of 17 structures related to structure **B** with energies between 58.7 kJmol<sup>-1</sup> and 67.3 kJmol<sup>-1</sup> of the lowest energy conformer. The equilibrium geometry of **A** was refined using molecular mechanics energy minimization methods (MMFF94) within *Spartan '14* and used as the starting geometry for gas phase DFT calculations (B3LYP/6-311G\*). The same method was applied to structure **E**. Analysis of 72 conformers again resulted in two groups being retained: a cluster of 14 very similar structures within 7.9 kJmol<sup>-1</sup> of the lowest energy conformer a second cluster of 15 structures related to structure **F** with energies between 63.0 kJmol<sup>-1</sup> and 71.3 kJmol<sup>-1</sup> of the lowest energy conformer. The same method was applied to structure **G**. Analysis of 72 conformers again resulted in two groups being retained: a cluster of 14 very similar structures within 8.0 kJmol<sup>-1</sup> of the lowest energy conformer a second cluster of 16 structures related to structure **H** with energies between 57.2 kJmol<sup>-1</sup> and 65.4 kJmol<sup>-1</sup> of the lowest energy conformer. Tautomers **C**, **D** and **H** were unstable and reverted to structures **A**, **B** and **G**, respectively. MMFF94-derived structures were used as inputs for DFT calculations as before. First excited (triplet) states were computed as above but using a time-dependent density functional (TDDFT) model as implemented in *Spartan '14*, also using B3LYP/6-311G\* in a vacuum.

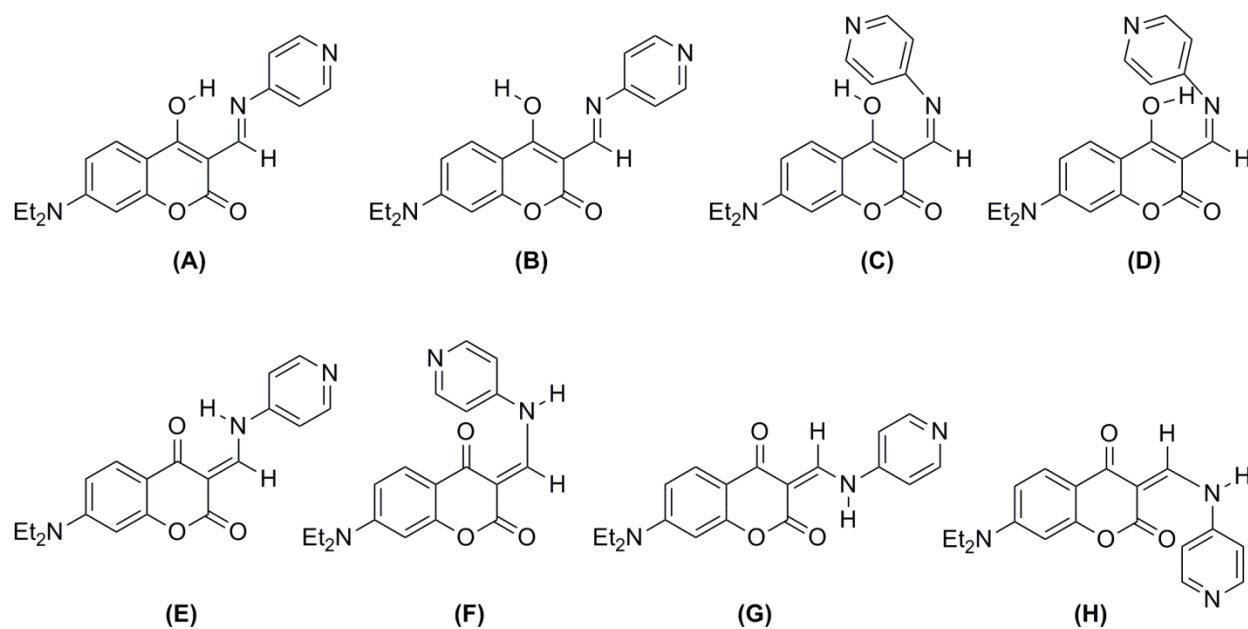

Figure S35: Possible tautomers for molecular probe 3.



## Cyanide addition

A sequence of structures was generated in which CN<sup>-</sup> approached the target carbon down a vector. A reaction trajectory was attempted using DFT/B3LYP/6-311G\* but simulations resulted in proton abstraction rather than cyanide addition so a simpler method was employed. A trial semiempirical simulation indicated that there were no orbital interactions between CN<sup>-</sup> and the target at distances exceeding 3.147 Å for both reactions. This was taken as a starting point and the C-CN distance was reduced in steps of 0.333 Å down to 1.480 Å which had been identified as the optimum C-CN bond distance from a DFT/B3LYP/6-311G\* calculation. At each step the C-CN distance was constrained by freezing the positions of both carbon atoms and the C-CN angle was constrained to 180°. With these constraints, geometry optimisation was undertaken using molecular mechanics (MMFF94). To account for the transition between the initial system in which CN<sup>-</sup> has no interaction with the neutral target to that in which CN is covalently linked and the negative charge has migrated to the phenol, three models were used. In the first both oxygens were given a formal double bond (I), in the last all bond migrations had occurred (III) and in the intermediate four structures delocalised bonds were set (II). The resulting structures were used to generate molecular orbitals at a semiempirical (PM6) level.

Table S6. Frontier molecular orbital energies for stable conformers.

|                               |        | A      | B      | E      | F      | G      |
|-------------------------------|--------|--------|--------|--------|--------|--------|
| <b>Ground state</b>           | HOMO   | -5.811 | -5.850 | -5.672 | -5.641 | -5.745 |
|                               | LUMO   | -2.247 | -2.150 | -2.307 | -2.147 | -2.270 |
| <b>First excited state</b>    | α-HOMO | -3.266 | -3.278 | -3.342 | -3.208 | -3.140 |
|                               | α-LUMO | -1.261 | -1.061 | -1.195 | -1.039 | -1.308 |
|                               | β-HOMO | -6.167 | -6.114 | -5.860 | -5.617 | -5.617 |
|                               | β-LUMO | -4.722 | -4.641 | -4.878 | -5.061 | -5.061 |
| <b>ΔE(eV)</b>                 |        | 0.000  | -0.039 | 0.139  | 0.170  | 0.066  |
| <b>ΔE(kJmol<sup>-1</sup>)</b> |        | 0.000  | -3.763 | 13.41  | 16.40  | 6.37   |

Table S7. Frontier molecular orbital energy changes during C-CN bond formation.

| Orbital energy (eV) | C <sup>•••</sup> CN <sup>-</sup> distance (Å) |       |       |       |       |       |
|---------------------|-----------------------------------------------|-------|-------|-------|-------|-------|
|                     | 3.147                                         | 2.813 | 2.480 | 2.147 | 1.813 | 1.480 |
| X = N               |                                               |       |       |       |       |       |
| LUMO                | 1.72                                          | 1.73  | 2.06  | 2.41  | 2.62  | 2.65  |
| HOMO                | -2.98                                         | -3.54 | -4.27 | -5.20 | -5.59 | -5.45 |
| X = CH              |                                               |       |       |       |       |       |
| LUMO                | 1.93                                          | 1.97  | 2.27  | 2.53  | 2.66  | 2.90  |
| HOMO                | -2.81                                         | -3.35 | -4.07 | -4.98 | -5.17 | -5.29 |

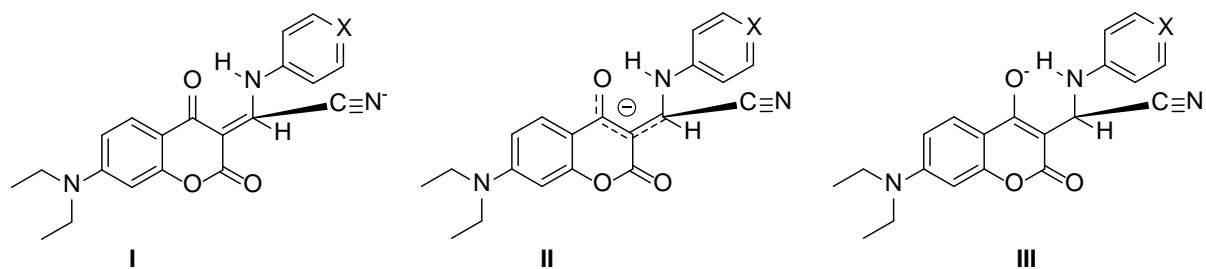

Figure S36. Representations of structures used to generate input geometries for MMFF94/PM6 calculations (X = N or CH).

### X-Ray Tables

Crystal data for **3**,  $C_{19}H_{19}N_3O_3$ ,  $M = 337.37$ , yellow lath,  $0.42 \times 0.09 \times 0.02 \text{ mm}^3$ , triclinic, space group  $P-1$  (No. 2),  $a = 5.0790(4)$ ,  $b = 12.8141(10)$ ,  $c = 13.2671(9) \text{ \AA}$ ,  $\alpha = 70.308(5)$ ,  $\beta = 80.767(5)$ ,  $\gamma = 88.005(5)^\circ$ ,  $V = 802.26(10) \text{ \AA}^3$ ,  $Z = 2$ ,  $D_c = 1.397 \text{ g/cm}^3$ ,  $F_{000} = 356$ ,  $\mu = 0.786 \text{ mm}^{-1}$ , Bruker Kappa APEX-II DUO,  $\text{CuK}\alpha$  radiation,  $\lambda = 1.54184 \text{ \AA}$ ,  $T = 100.0(5) \text{ K}$ ,  $2\theta_{\text{max}} = 127.8^\circ$ , 9920 reflections collected, 2566 unique ( $R_{\text{int}} = 0.0388$ ). Final  $GOF = 1.100$ ,  $R1 = 0.0454$ ,  $wR2 = 0.1301$ ,  $R$  indices based on 2245 reflections with  $I > 2\sigma(I)$  (refinement on  $F^2$ ), 250 parameters, 2 restraints.  $Lp$  and absorption corrections applied,  $\Delta\rho_{\text{max}} = 0.25 \text{ e\AA}^{-3}$ ,  $\Delta\rho_{\text{min}} = -0.31 \text{ e\AA}^{-3}$ .

# supplementary materials

## Computing details

Data collection: Bruker *APEX2*; cell refinement: Bruker *SAINT*; data reduction: Bruker *SAINT*; program(s) used to solve structure: *SHELXS97* (Sheldrick, 2008); program(s) used to refine structure: *SHELXL97* (Sheldrick, 2008); molecular graphics: *ORTEP-3 for Windows* (Farrugia, 2012); software used to prepare material for publication: *SHELXL97* (Sheldrick, 2008).

## (Compound 3)

### Crystal data

|                                 |                                                         |
|---------------------------------|---------------------------------------------------------|
| $C_{19}H_{19}N_3O_3$            | $Z = 2$                                                 |
| $M_r = 337.37$                  | $F(000) = 356$                                          |
| Triclinic, $P\bar{1}$           | $D_x = 1.397 \text{ Mg m}^{-3}$                         |
| Hall symbol: -P 1               | Cu $K\alpha$ radiation, $\lambda = 1.54184 \text{ \AA}$ |
| $a = 5.0790 (4) \text{ \AA}$    | Cell parameters from 3404 reflections                   |
| $b = 12.8141 (10) \text{ \AA}$  | $\theta = 3.6\text{--}63.6^\circ$                       |
| $c = 13.2671 (9) \text{ \AA}$   | $\mu = 0.79 \text{ mm}^{-1}$                            |
| $\alpha = 70.308 (5)^\circ$     | $T = 100 \text{ K}$                                     |
| $\beta = 80.767 (5)^\circ$      | Lath, yellow                                            |
| $\gamma = 88.005 (5)^\circ$     | $0.42 \times 0.09 \times 0.02 \text{ mm}$               |
| $V = 802.26 (10) \text{ \AA}^3$ |                                                         |

### Data collection

|                                                     |                                                                        |
|-----------------------------------------------------|------------------------------------------------------------------------|
| Bruker Kappa APEX-II DUO                            | 9920 measured reflections                                              |
| diffractometer                                      | 2566 independent reflections                                           |
| Radiation source: $I\mu S$ microfocus               | 2245 reflections with $I > 2\sigma(I)$                                 |
| QUAZAR multilayer optics monochromator              | $R_{\text{int}} = 0.039$                                               |
| $\varphi$ and $\omega$ scans                        | $\theta_{\text{max}} = 63.9^\circ$ , $\theta_{\text{min}} = 3.6^\circ$ |
| Absorption correction: multi-scan                   | $h = -5 \rightarrow 5$                                                 |
| TWINABS (Sheldrick, 2004)                           | $k = -13 \rightarrow 14$                                               |
| $T_{\text{min}} = 0.734$ , $T_{\text{max}} = 0.985$ | $l = 0 \rightarrow 15$                                                 |

### Refinement

|                                                                |                                                                        |
|----------------------------------------------------------------|------------------------------------------------------------------------|
| Refinement on $F^2$                                            | Secondary atom site location: difference Fourier map                   |
| Least-squares matrix: full                                     | Hydrogen site location: inferred from neighbouring sites               |
| $R[F^2 > 2\sigma(F^2)] = 0.045$                                | H atoms treated by a mixture of independent and constrained refinement |
| $wR(F^2) = 0.141$                                              | $w = 1/[\sigma^2(F_o^2) + (0.0953P)^2 + 0.1126P]$                      |
| $S = 1.10$                                                     | where $P = (F_o^2 + 2F_c^2)/3$                                         |
| 2566 reflections                                               | $(\Delta/\sigma)_{\text{max}} < 0.001$                                 |
| 250 parameters                                                 | $\Delta\rho_{\text{max}} = 0.25 \text{ e \AA}^{-3}$                    |
| 2 restraints                                                   | $\Delta\rho_{\text{min}} = -0.31 \text{ e \AA}^{-3}$                   |
| Primary atom site location: structure-invariant direct methods |                                                                        |

### Special details

#### Refinement

Refinement of  $F^2$  against ALL reflections. The crystal was a nonmerohedral twin by  $180^\circ$  rotation about the reciprocal 0 0 1 axis. Refinement was against HKLF 5 data, and the BASF parameter refined to 0.425 (2).

Fractional atomic coordinates and isotropic or equivalent isotropic displacement parameters ( $\text{\AA}^2$ )

|      | <i>x</i>    | <i>y</i>     | <i>z</i>     | $U_{\text{iso}}^*/U_{\text{eq}}$ | Occ. (<1) |
|------|-------------|--------------|--------------|----------------------------------|-----------|
| O1   | 0.5386 (3)  | 0.61811 (11) | 0.59765 (10) | 0.0170 (4)                       |           |
| O2   | 0.2451 (3)  | 0.56753 (12) | 0.51698 (11) | 0.0202 (4)                       |           |
| O3   | 0.3942 (3)  | 0.33335 (12) | 0.86339 (11) | 0.0202 (4)                       |           |
| N1   | 0.0529 (4)  | 0.27177 (15) | 0.76225 (15) | 0.0185 (4)                       |           |
| H1N  | 0.134 (5)   | 0.258 (2)    | 0.817 (2)    | 0.022*                           |           |
| N2   | −0.5013 (4) | 0.02793 (15) | 0.77850 (16) | 0.0265 (5)                       |           |
| N3   | 1.1587 (5)  | 0.75856 (16) | 0.75483 (15) | 0.0312 (5)                       |           |
| C1   | 0.3523 (4)  | 0.54285 (17) | 0.59646 (16) | 0.0168 (5)                       |           |
| C2   | 0.3029 (4)  | 0.44117 (17) | 0.68960 (16) | 0.0158 (5)                       |           |
| C3   | 0.4358 (4)  | 0.42014 (17) | 0.78321 (16) | 0.0157 (5)                       |           |
| C4   | 0.6218 (4)  | 0.50614 (17) | 0.77762 (16) | 0.0151 (5)                       |           |
| C5   | 0.6688 (4)  | 0.60091 (17) | 0.68585 (16) | 0.0159 (5)                       |           |
| C6   | 0.8441 (4)  | 0.68418 (17) | 0.67643 (16) | 0.0182 (5)                       |           |
| H6   | 0.8707      | 0.7470       | 0.6121       | 0.022*                           |           |
| C7   | 0.9843 (5)  | 0.67681 (17) | 0.76172 (16) | 0.0192 (5)                       |           |
| C8   | 0.9382 (4)  | 0.58062 (17) | 0.85588 (16) | 0.0185 (5)                       |           |
| H8   | 1.0300      | 0.5729       | 0.9149       | 0.022*                           |           |
| C9   | 0.7633 (4)  | 0.49910 (17) | 0.86228 (16) | 0.0175 (5)                       |           |
| H9   | 0.7365      | 0.4356       | 0.9260       | 0.021*                           |           |
| C10  | 0.1190 (4)  | 0.36805 (17) | 0.68350 (16) | 0.0169 (5)                       |           |
| H10  | 0.0358      | 0.3870       | 0.6206       | 0.020*                           |           |
| C11  | −0.1308 (4) | 0.19165 (17) | 0.76406 (17) | 0.0179 (5)                       |           |
| C12  | −0.2766 (5) | 0.20437 (18) | 0.68084 (18) | 0.0214 (5)                       |           |
| H12  | −0.2537     | 0.2684       | 0.6176       | 0.026*                           |           |
| C13  | −0.4566 (5) | 0.12070 (18) | 0.69297 (18) | 0.0253 (5)                       |           |
| H13  | −0.5563     | 0.1301       | 0.6358       | 0.030*                           |           |
| C14  | −0.3548 (5) | 0.01738 (18) | 0.85654 (18) | 0.0237 (5)                       |           |
| H14  | −0.3799     | −0.0481      | 0.9183       | 0.028*                           |           |
| C15  | −0.1694 (5) | 0.09530 (18) | 0.85344 (18) | 0.0201 (5)                       |           |
| H15  | −0.0705     | 0.0831       | 0.9113       | 0.024*                           |           |
| C16  | 1.2553 (11) | 0.8462 (4)   | 0.6506 (4)   | 0.0199 (14)                      | 0.546 (8) |
| H16A | 1.2515      | 0.8190       | 0.5893       | 0.024*                           | 0.546 (8) |
| H16B | 1.4405      | 0.8693       | 0.6488       | 0.024*                           | 0.546 (8) |
| C17  | 1.0688 (10) | 0.9425 (5)   | 0.6433 (4)   | 0.0237 (13)                      | 0.546 (8) |
| H17A | 1.1265      | 1.0035       | 0.5757       | 0.036*                           | 0.546 (8) |
| H17B | 1.0724      | 0.9676       | 0.7051       | 0.036*                           | 0.546 (8) |
| H17C | 0.8869      | 0.9187       | 0.6442       | 0.036*                           | 0.546 (8) |
| C16A | 1.1112 (13) | 0.8769 (6)   | 0.6809 (4)   | 0.0181 (15)                      | 0.454 (8) |
| H16C | 0.9255      | 0.8840       | 0.6659       | 0.022*                           | 0.454 (8) |
| H16D | 1.1438      | 0.9316       | 0.7156       | 0.022*                           | 0.454 (8) |
| C17A | 1.3075 (11) | 0.8956 (5)   | 0.5768 (5)   | 0.0296 (18)                      | 0.454 (8) |
| H17D | 1.2867      | 0.9704       | 0.5264       | 0.044*                           | 0.454 (8) |
| H17E | 1.2724      | 0.8408       | 0.5436       | 0.044*                           | 0.454 (8) |
| H17F | 1.4900      | 0.8876       | 0.5932       | 0.044*                           | 0.454 (8) |
| C18  | 1.3080 (5)  | 0.75110 (18) | 0.84227 (16) | 0.0199 (5)                       |           |
| H18A | 1.4702      | 0.7990       | 0.8117       | 0.024*                           |           |
| H18B | 1.3661      | 0.6738       | 0.8729       | 0.024*                           |           |
| C19  | 1.1499 (5)  | 0.78513 (18) | 0.93317 (18) | 0.0221 (5)                       |           |
| H19A | 1.1125      | 0.8644       | 0.9058       | 0.033*                           |           |
| H19B | 1.2539      | 0.7704       | 0.9925       | 0.033*                           |           |
| H19C | 0.9815      | 0.7425       | 0.9598       | 0.033*                           |           |

*Atomic displacement parameters ( $\text{\AA}^2$ )*

|      | $U^{11}$    | $U^{22}$    | $U^{33}$    | $U^{12}$     | $U^{13}$     | $U^{23}$     |
|------|-------------|-------------|-------------|--------------|--------------|--------------|
| O1   | 0.0205 (9)  | 0.0150 (7)  | 0.0160 (7)  | −0.0034 (6)  | −0.0045 (6)  | −0.0047 (6)  |
| O2   | 0.0242 (9)  | 0.0210 (8)  | 0.0169 (7)  | −0.0009 (7)  | −0.0079 (6)  | −0.0062 (6)  |
| O3   | 0.0230 (9)  | 0.0165 (8)  | 0.0190 (8)  | −0.0042 (6)  | −0.0027 (6)  | −0.0030 (6)  |
| N1   | 0.0196 (11) | 0.0179 (10) | 0.0198 (9)  | −0.0002 (8)  | −0.0051 (8)  | −0.0077 (8)  |
| N2   | 0.0245 (12) | 0.0201 (10) | 0.0354 (11) | −0.0041 (9)  | −0.0046 (9)  | −0.0095 (8)  |
| N3   | 0.0477 (14) | 0.0213 (11) | 0.0222 (10) | −0.0198 (10) | −0.0154 (9)  | 0.0024 (8)   |
| C1   | 0.0167 (12) | 0.0166 (10) | 0.0194 (10) | 0.0001 (9)   | 0.0003 (9)   | −0.0105 (9)  |
| C2   | 0.0146 (12) | 0.0157 (10) | 0.0181 (10) | 0.0009 (9)   | −0.0009 (9)  | −0.0080 (8)  |
| C3   | 0.0143 (12) | 0.0142 (10) | 0.0177 (10) | 0.0008 (9)   | 0.0008 (8)   | −0.0058 (9)  |
| C4   | 0.0117 (11) | 0.0168 (11) | 0.0193 (10) | 0.0015 (9)   | −0.0028 (8)  | −0.0092 (8)  |
| C5   | 0.0163 (12) | 0.0170 (11) | 0.0159 (10) | 0.0027 (9)   | −0.0032 (8)  | −0.0074 (9)  |
| C6   | 0.0235 (13) | 0.0140 (10) | 0.0154 (10) | −0.0033 (9)  | −0.0024 (9)  | −0.0028 (8)  |
| C7   | 0.0212 (13) | 0.0174 (11) | 0.0205 (11) | −0.0014 (10) | −0.0034 (9)  | −0.0081 (9)  |
| C8   | 0.0208 (13) | 0.0196 (11) | 0.0161 (10) | 0.0013 (9)   | −0.0054 (9)  | −0.0061 (9)  |
| C9   | 0.0192 (12) | 0.0140 (10) | 0.0172 (10) | −0.0005 (9)  | −0.0011 (8)  | −0.0032 (8)  |
| C10  | 0.0162 (12) | 0.0171 (11) | 0.0191 (10) | 0.0023 (9)   | −0.0012 (8)  | −0.0092 (9)  |
| C11  | 0.0143 (12) | 0.0173 (11) | 0.0244 (11) | 0.0007 (9)   | −0.0002 (9)  | −0.0111 (9)  |
| C12  | 0.0221 (13) | 0.0164 (11) | 0.0259 (11) | 0.0002 (10)  | −0.0056 (9)  | −0.0063 (9)  |
| C13  | 0.0261 (14) | 0.0210 (12) | 0.0296 (13) | −0.0004 (10) | −0.0077 (10) | −0.0079 (10) |
| C14  | 0.0242 (14) | 0.0156 (11) | 0.0281 (12) | −0.0024 (10) | −0.0006 (10) | −0.0045 (9)  |
| C15  | 0.0185 (13) | 0.0199 (11) | 0.0229 (11) | 0.0005 (10)  | −0.0031 (9)  | −0.0087 (9)  |
| C16  | 0.016 (3)   | 0.023 (3)   | 0.021 (3)   | −0.003 (2)   | −0.002 (2)   | −0.009 (3)   |
| C17  | 0.027 (3)   | 0.020 (3)   | 0.023 (2)   | 0.001 (2)    | −0.0082 (19) | −0.004 (2)   |
| C16A | 0.021 (3)   | 0.012 (4)   | 0.020 (3)   | 0.000 (3)    | −0.007 (3)   | −0.002 (3)   |
| C17A | 0.031 (4)   | 0.030 (3)   | 0.018 (4)   | −0.006 (3)   | 0.002 (2)    | 0.001 (3)    |
| C18  | 0.0197 (13) | 0.0194 (11) | 0.0213 (11) | −0.0046 (9)  | −0.0039 (9)  | −0.0069 (9)  |
| C19  | 0.0232 (14) | 0.0180 (11) | 0.0243 (11) | −0.0011 (10) | −0.0018 (9)  | −0.0067 (9)  |

*Geometric parameters ( $\text{\AA}$ ,  $^\circ$ )*

|         |           |           |           |
|---------|-----------|-----------|-----------|
| O1—C1   | 1.380 (3) | C11—C15   | 1.387 (3) |
| O1—C5   | 1.386 (2) | C11—C12   | 1.388 (3) |
| O2—C1   | 1.207 (3) | C12—C13   | 1.384 (3) |
| O3—C3   | 1.249 (2) | C12—H12   | 0.9500    |
| N1—C10  | 1.332 (3) | C13—H13   | 0.9500    |
| N1—C11  | 1.403 (3) | C14—C15   | 1.382 (3) |
| N1—H1N  | 0.86 (3)  | C14—H14   | 0.9500    |
| N2—C13  | 1.334 (3) | C15—H15   | 0.9500    |
| N2—C14  | 1.338 (3) | C16—C17   | 1.515 (7) |
| N3—C7   | 1.365 (3) | C16—H16A  | 0.9900    |
| N3—C18  | 1.460 (3) | C16—H16B  | 0.9900    |
| N3—C16  | 1.479 (5) | C17—H17A  | 0.9800    |
| N3—C16A | 1.538 (7) | C17—H17B  | 0.9800    |
| C1—C2   | 1.458 (3) | C17—H17C  | 0.9800    |
| C2—C10  | 1.376 (3) | C16A—C17A | 1.521 (7) |
| C2—C3   | 1.450 (3) | C16A—H16C | 0.9900    |
| C3—C4   | 1.452 (3) | C16A—H16D | 0.9900    |
| C4—C5   | 1.394 (3) | C17A—H17D | 0.9800    |
| C4—C9   | 1.404 (3) | C17A—H17E | 0.9800    |
| C5—C6   | 1.374 (3) | C17A—H17F | 0.9800    |
| C6—C7   | 1.407 (3) | C18—C19   | 1.519 (3) |

|             |             |                |           |
|-------------|-------------|----------------|-----------|
| C6—H6       | 0.9500      | C18—H18A       | 0.9900    |
| C7—C8       | 1.422 (3)   | C18—H18B       | 0.9900    |
| C8—C9       | 1.367 (3)   | C19—H19A       | 0.9800    |
| C8—H8       | 0.9500      | C19—H19B       | 0.9800    |
| C9—H9       | 0.9500      | C19—H19C       | 0.9800    |
| C10—H10     | 0.9500      |                |           |
| C1—O1—C5    | 121.71 (16) | N2—C13—C12     | 125.2 (2) |
| C10—N1—C11  | 127.1 (2)   | N2—C13—H13     | 117.4     |
| C10—N1—H1N  | 115.2 (17)  | C12—C13—H13    | 117.4     |
| C11—N1—H1N  | 117.6 (17)  | N2—C14—C15     | 124.5 (2) |
| C13—N2—C14  | 115.5 (2)   | N2—C14—H14     | 117.8     |
| C7—N3—C18   | 122.00 (18) | C15—C14—H14    | 117.8     |
| C7—N3—C16   | 121.8 (2)   | C14—C15—C11    | 118.6 (2) |
| C18—N3—C16  | 114.7 (2)   | C14—C15—H15    | 120.7     |
| C7—N3—C16A  | 117.6 (3)   | C11—C15—H15    | 120.7     |
| C18—N3—C16A | 115.4 (2)   | N3—C16—C17     | 106.4 (4) |
| O2—C1—O1    | 116.27 (18) | N3—C16—H16A    | 110.5     |
| O2—C1—C2    | 125.7 (2)   | C17—C16—H16A   | 110.5     |
| O1—C1—C2    | 117.99 (18) | N3—C16—H16B    | 110.5     |
| C10—C2—C3   | 122.49 (19) | C17—C16—H16B   | 110.5     |
| C10—C2—C1   | 115.67 (19) | H16A—C16—H16B  | 108.6     |
| C3—C2—C1    | 121.83 (19) | C16—C17—H17A   | 109.5     |
| O3—C3—C2    | 122.2 (2)   | C16—C17—H17B   | 109.5     |
| O3—C3—C4    | 122.06 (19) | H17A—C17—H17B  | 109.5     |
| C2—C3—C4    | 115.73 (18) | C16—C17—H17C   | 109.5     |
| C5—C4—C9    | 116.6 (2)   | H17A—C17—H17C  | 109.5     |
| C5—C4—C3    | 120.69 (19) | H17B—C17—H17C  | 109.5     |
| C9—C4—C3    | 122.71 (19) | C17A—C16A—N3   | 105.9 (5) |
| C6—C5—O1    | 115.15 (18) | C17A—C16A—H16C | 110.6     |
| C6—C5—C4    | 122.86 (19) | N3—C16A—H16C   | 110.6     |
| O1—C5—C4    | 122.0 (2)   | C17A—C16A—H16D | 110.6     |
| C5—C6—C7    | 120.25 (19) | N3—C16A—H16D   | 110.6     |
| C5—C6—H6    | 119.9       | H16C—C16A—H16D | 108.7     |
| C7—C6—H6    | 119.9       | C16A—C17A—H17D | 109.5     |
| N3—C7—C6    | 121.53 (19) | C16A—C17A—H17E | 109.5     |
| N3—C7—C8    | 120.97 (19) | H17D—C17A—H17E | 109.5     |
| C6—C7—C8    | 117.5 (2)   | C16A—C17A—H17F | 109.5     |
| C9—C8—C7    | 120.7 (2)   | H17D—C17A—H17F | 109.5     |
| C9—C8—H8    | 119.7       | H17E—C17A—H17F | 109.5     |
| C7—C8—H8    | 119.7       | N3—C18—C19     | 113.7 (2) |
| C8—C9—C4    | 122.1 (2)   | N3—C18—H18A    | 108.8     |
| C8—C9—H9    | 118.9       | C19—C18—H18A   | 108.8     |
| C4—C9—H9    | 118.9       | N3—C18—H18B    | 108.8     |
| N1—C10—C2   | 122.6 (2)   | C19—C18—H18B   | 108.8     |
| N1—C10—H10  | 118.7       | H18A—C18—H18B  | 107.7     |
| C2—C10—H10  | 118.7       | C18—C19—H19A   | 109.5     |
| C15—C11—C12 | 118.4 (2)   | C18—C19—H19B   | 109.5     |
| C15—C11—N1  | 118.5 (2)   | H19A—C19—H19B  | 109.5     |
| C12—C11—N1  | 123.1 (2)   | C18—C19—H19C   | 109.5     |
| C13—C12—C11 | 117.9 (2)   | H19A—C19—H19C  | 109.5     |
| C13—C12—H12 | 121.1       | H19B—C19—H19C  | 109.5     |
| C11—C12—H12 | 121.1       |                |           |

Hydrogen-bond geometry (Å, °)

| <i>D</i> —H··· <i>A</i>   | <i>D</i> —H | H··· <i>A</i> | <i>D</i> ··· <i>A</i> | <i>D</i> —H··· <i>A</i> |
|---------------------------|-------------|---------------|-----------------------|-------------------------|
| N1—H1N···O3               | 0.86 (3)    | 1.95 (3)      | 2.642 (2)             | 137 (2)                 |
| C10—H10···O2 <sup>i</sup> | 0.95        | 2.40          | 3.342 (3)             | 170                     |
| C12—H12···O2 <sup>i</sup> | 0.95        | 2.25          | 3.191 (3)             | 171                     |

Symmetry code: (i)  $-x, -y+1, -z+1$ .

**References:**

1. M. Cigáň; J. Donovalová; V. Szöcs; J. Gašpar; K. Jakusová; A. Gáplovský, *J. Phys. Chem. A* 2013, **117**, 4870.
2. Wavefunction, Inc.: Irvine, CA, 2014.
